# Supplementary material for: Environmental enrichment and physical exercise prevent stress-induced social avoidance and blood-brain barrier alterations via Fgf2.
Source: Research Square preprint supplement (doi:10.21203/rs.3.rs-5867280/v1), 2025-01-30
Supplement: Supplementary file 1 [file 9382dd281e24e2df8077f748.xlsx]

## Sheet: Fig. 1
Panel	Behavior	Group	N value	Replicate	Statistical test	Factor	P value	F value	df (between)	df (within)	Multiple Comparisons	Test	p value	t/Z value	df
1B	SI Ratio	SE - CTRL	10	Mouse	Two-way Anova	Interaction	**0.0029	9.376	1	88	Bonferroni	SE-CTRL vs. EE-CTRL	*0.0288	2.896	86
		EE - CTRL	17	Mouse		Stress	***<0.0001	18.18	1	88		SE-CTRL vs SE-CSDS	****<0.0001	4.651	86
		SE - CSDS	27	Mouse		Environment	0.0679	3.417	1	88		SE-CTRL vs. EE-CSDS	**0.0011	3.922	86
		EE - CSDS	38	Mouse								EE-CTRL vs. SE-CSDS	0.421	1.834	86
												EE-CTRL vs. EE-CSDS	>0.9999	0.8426	86
												SE-CSDS vs. EE-CSDS	>0.9999	1.256	86
Panel	Behavior	Group	N value	Replicate	Statistical test	Factor	P value	F value	df (between)	df (within)	Multiple Comparisons	Test	p value	t/Z value	df
1C	Corner time CD-1 Present	SE - CTRL	9	Mouse	Two-way Anova	Interaction	**0.0055	8.118	1	87	Bonferroni	SE-CTRL vs. EE-CTRL	>0.9999	0.2901	85
		EE - CTRL	17	Mouse		Stress	**0.0052	8.229	1	87		SE-CTRL vs SE-CSDS	**0.0028	3.641	85
		SE - CSDS	26	Mouse		Environment	*0.0201	5.609	1	87		SE-CTRL vs. EE-CSDS	>0.9999	0.1407	85
		EE - CSDS	38	Mouse								EE-CTRL vs. SE-CSDS	***0.0004	4.207	85
												EE-CTRL vs. EE-CSDS	>0.9999	0.2286	85
												SE-CSDS vs. EE-CSDS	****<0.0001	5.268	85
heatmap NAc CTRL vs CSDS											heatmap NAc CTRL vs SS vs RES
Panel	gene	Group	N value	Replicate	Statistical test	P value	t/u value	df			Panel	gene	Group	N value	Replicate	Statistical test	P value	F value/KW statistic	df (between)	df (within)	Multiple Comparisons	Test	p value	t/Z value	df
1D	Vegfa	CTRL	13	Mouse	Welch's T-test	0.2519	1.154	35.88			1D	Vegfa	CTRL	13	Mouse	One-way Aova	*0.0272	3.989	2	36	CTRL vs SS	Bonferroni	>0.9999	0.5314	36
		CSDS	25	Mouse									SS	9	Mouse						CTRL vs RES		0.5721	1.334	36
	Fgf2	CTRL	13	Mouse	Welch's T-test	*0.038	2.157	34.92					RES	17	Mouse						SS vs RES		>0.9999	0.633	36
		CSDS	26	Mouse								Fgf2	CTRL	13	Mouse	One-way Aova	0.2772	1.33	2	36	CTRL vs SS	Bonferroni	0.604	1.302	36
	Pdgfb	CTRL	13	Mouse	Welch's T-test	0.8424	0.2008	26.22					SS	9	Mouse						CTRL vs RES		0.4365	1.488	36
		CSDS	26	Mouse									RES	17	Mouse						SS vs RES		>0.9999	0.03933	36
	Pecam-1	CTRL	13	Mouse	Welch's T-test	*0.0241	2.392	26.63				Pdgfb	CTRL	13	Mouse	One-way Aova	0.3722	1.016	2	36	CTRL vs SS	Bonferroni	0.9269	1.032	36
		CSDS	25	Mouse									SS	0	Mouse						CTRL vs RES		>0.9999	0.365	36
	FgfR1	CTRL	12	Mouse	Welch's T-test	0.2937	1.069	29.14					RES	17	Mouse						SS vs RES		0.4998	1.412	36
		CSDS	25	Mouse								Pecam-1	CTRL	13	Mouse	One-way Aova	*0.0284	3.962	2	34	CTRL vs SS	Bonferroni	0.054	2.486	34
	Angpt2	CTRL	12	Mouse	Welch's T-test	0.4292	0.8012	30.82					SS	8	Mouse						CTRL vs RES		0.0806	2.314	34
		CSDS	25	Mouse									RES	16	Mouse						SS vs RES		>0.9999	0.5845	34
	Cldn5	CTRL	12	Mouse	Mann-Whitney U test	*0.0253	85					FgfR1	CTRL	12	Mouse	One-way Aova	0.279	1.326	2	34	CTRL vs SS	Bonferroni	0.3829	1.562	34
		CSDS	26	Mouse									SS	9	Mouse						CTRL vs RES		>0.9999	0.3725	34
	Ocln	CTRL	12	Mouse	Welch's T-test	*0.0446	2.102	28.39					RES	16	Mouse						SS vs RES		0.5956	1.311	34
		CSDS	26	Mouse								Angpt2	CTRL	12	Mouse	Kruskal-Wallis Test	0.8165	0.4056			CTRL vs SS	Dunn's	>0.9999	0.5725
	Tjp1	CTRL	12	Mouse	Welch's T-test	0.2946	1.064	35.98					SS	9	Mouse						CTRL vs RES		>0.9999	0.04563
		CSDS	26	Mouse									RES	17	Mouse						SS vs RES		>0.9999	0.5707
	Marveld2	CTRL	13	Mouse	Welch's T-test	0.178	1.378	31.74				Cldn5	CTRL	12	Mouse	One-way Aova	0.0981	2.482	2	35	CTRL vs SS	Bonferroni	0.329	1.641	35
		CSDS	25	Mouse									SS	9	Mouse						CTRL vs RES		0.1217	2.127	35
	Gfap	CTRL	12	Mouse	Welch's T-test	0.8255	0.2221	33.97					RES	17	Mouse						SS vs RES		>0.9999	0.1892	35
		CSDS	25	Mouse								Ocln	CTRL	12	Mouse	One-way Aova	0.1283	2.179	2	35	CTRL vs SS	Bonferroni	0.1459	2.043	35
	Aqp4	CTRL	13	Mouse	Welch's T-test	*0.019	2.567	18.73					SS	9	Mouse						CTRL vs RES		0.516	1.394	35
		CSDS	25	Mouse									RES	17	Mouse						SS vs RES		>0.9999	0.9103	35
	Pdgfrβ	CTRL	13	Mouse	Welch's T-test	0.3748	0.9002	31.68				Tjp1	CTRL	12	Mouse	One-way Aova	0.7022	0.3571	2	35	CTRL vs SS	Bonferroni	>0.9999	0.5203	35
		CSDS	26	Mouse									SS	9	Mouse						CTRL vs RES		>0.9999	0.837	35
	Desmin	CTRL	13	Mouse	Welch's T-test	0.0564	1.982	31.15					RES	17	Mouse						SS vs RES		>0.9999	0.209	35
		CSDS	26	Mouse								Marveld2	CTRL	13	Mouse	One-way Aova	0.4985	0.7107	2	34	CTRL vs SS	Bonferroni	>0.9999	0.3402	34
	Il-6	CTRL	12	Mouse	Mann-Whitney U test	0.2672	115						SS	8	Mouse						CTRL vs RES		0.7487	1.171	34
		CSDS	25	Mouse									RES	16	Mouse						SS vs RES		>0.9999	0.6571	34
	Il-18	CTRL	13	Mouse	Welch's T-test	0.557	0.5943	28.52				Gfap	CTRL	12	Mouse	Kruskal-Wallis Test	0.7215	0.635			CTRL vs SS	Dunn's	>0.9999	0.2561
		CSDS	26	Mouse									SS	9	Mouse						CTRL vs RES		>0.9999	0.5393
	TNF-α	CTRL		Mouse	Mann-Whitney U test	0.7283	133						RES	16	Mouse						SS vs RES		>0.9999	0.7652
		CSDS		Mouse								Aqp4	CTRL	13	Mouse	One-way Aova	*0.0288	3.933	2	35	CTRL vs SS	Bonferroni	0.1095	2.175	35
													SS	9	Mouse						CTRL vs RES		0.0416	2.591	35
													RES	16	Mouse						SS vs RES		>0.9999	0.05886	35
												Pdgfrβ	CTRL	13	Mouse	One-way Aova	0.6674	0.4089	2	36	CTRL vs SS	Bonferroni	>0.9999	0.888	36
													SS	9	Mouse						CTRL vs RES		>0.9999	0.5776	36
													RES	17	Mouse						SS vs RES		>0.9999	0.4179	36
												Desmin	CTRL	13	Mouse	One-way Aova	0.2127	1.616	2	36	CTRL vs SS	Bonferroni	0.6969	1.215	36
													SS	9	Mouse						CTRL vs RES		0.2677	1.747	36
													RES	17	Mouse						SS vs RES		>0.9999	0.283	36
												Il-6	CTRL	12	Mouse	Kruskal-Wallis Test	0.3595	2.046			CTRL vs SS	Bonferroni	>0.9999	0.3783
													SS	9	Mouse						CTRL vs RES		0.4972	1.386
													RES	16	Mouse						SS vs RES		>0.9999	0.87
												Il-18	CTRL	13	Mouse	One-way Aova	0.3329	1.134	2	36	CTRL vs SS	Bonferroni	0.595	1.311	36
													SS	9	Mouse						CTRL vs RES		>0.9999	0.01974	36
													RES	17	Mouse						SS vs RES		0.5136	1.396	36
												TNF-α	CTRL	12	Mouse	Kruskal-Wallis Test	0.9338	0.1369			CTRL vs SS	Dunn's	>0.9999	0.281
													SS	9	Mouse						CTRL vs RES		>0.9999	0.3472
													RES	15	Mouse						SS vs RES		>0.9999	0.02501
heatmap PFC CTRL vs CSDS											heatmap PFC CTRL vs SS vs RES
Panel	gene	Group	N value	Replicate	Statistical test	P value	t/u value	df			Panel	gene	Group	N value	Replicate	Statistical test	P value	F value/KW statistic	df (between)	df (within)	Multiple Comparisons	Test	p value	t/Z value	df
1D	Vegfa	CTRL	12	Mouse	Mann-Whitney U test	**0.0048	68				1D	Vegfa	CTRL	12	Mouse	One-way Aova	**0.0095	5.329	2	35	CTRL vs SS	Bonferroni	0.2994	1.691	35
		CSDS	26	Mouse									SS	9	Mouse						CTRL vs RES		**0.0074	3.264	35
	Fgf2	CTRL	13	Mouse	Mann-Whitney U test	*0.0196	87						RES	17	Mouse						SS vs RES		0.7415	1.177	35
		CSDS	25	Mouse								Fgf2	CTRL	13	Mouse	Kruskal-Wallis test	0.0502	5.985			CTRL vs SS	Dunn's	0.1381	1.995
	Pdgfb	CTRL	13	Mouse	Welch's T-test	**0.0047	3.012	36.77					SS	9	Mouse						CTRL vs RES		0.0831	2.202
		CSDS	26	Mouse									RES	17	Mouse						SS vs RES		>0.9999	0.1307
	Pecam-1	CTRL	13	Mouse	Welch's T-test	0.1902	1.348	24.07				Pdgfb	CTRL	13	Mouse	One-way Aova	0.0617	3.013	2	36	CTRL vs SS	Bonferroni	0.2214	1.841	36
		CSDS	26	Mouse									SS	9	Mouse						CTRL vs RES		0.0804	2.309	36
	FgfR1	CTRL	13	Mouse	Welch's T-test	**0.0017	3.394	35.66					RES	17	Mouse						SS vs RES		>0.9999	0.1268	36
		CSDS	25	Mouse								Pecam-1	CTRL	13	Mouse	One-way Aova	0.2915	1.276	2	36	CTRL vs SS	Bonferroni	0.3621	1.589	36
	Angpt2	CTRL	11	Mouse	Mann-Whitney U test	0.7867	129						SS	9	Mouse						CTRL vs RES		>0.9999	0.9048	36
		CSDS	25	Mouse									RES	17	Mouse						SS vs RES		>0.9999	0.8633	36
	Cldn5	CTRL	13	Mouse	Mann-Whitney U test	0.4008	140					FgfR1	CTRL	13	Mouse	One-way Aova	*0.0223	4.249	2	35	CTRL vs SS	Bonferroni	*0.037	2.639	35
		CSDS	26	Mouse									SS	9	Mouse						CTRL vs RES		0.0747	2.344	35
	Ocln	CTRL	13	Mouse	Mann-Whitney U test	0.9883	168						RES	16	Mouse						SS vs RES		>0.9999	0.6457	35
		CSDS	26	Mouse								Angpt2	CTRL	11	Mouse	Kruskal-Wallis test	0.6103	0.9875			CTRL vs SS	Dunn's	>0.9999	0.6727
	Tjp1	CTRL	13	Mouse	Welch's T-test	*0.0451	2.111	24.49					SS	9	Mouse						CTRL vs RES		>0.9999	0.2719
		CSDS	26	Mouse									RES	17	Mouse						SS vs RES		0.9684	0.9887
	Marveld2	CTRL	13	Mouse	Welch's T-test	0.4507	0.7675	22.61				Cldn5	CTRL	13	Mouse	Kruskal-Wallis test	0.6446	0.8782			CTRL vs SS	Dunn's	>0.9999	0.4512
		CSDS	25	Mouse									SS	9	Mouse						CTRL vs RES		>0.9999	0.9371
	Gfap	CTRL	13	Mouse	Welch's T-test	0.9722	0.03517	30.08					RES	17	Mouse						SS vs RES		>0.9999	0.3629
		CSDS	25	Mouse								Ocln	CTRL	13	Mouse	Kruskal-Wallis test	0.932	0.1408			CTRL vs SS	Dunn's	>0.9999	0.2092
	Aqp4	CTRL	13	Mouse	Welch's T-test	0.8146	0.2382	16.91					SS	9	Mouse						CTRL vs RES		>0.9999	0.1723
		CSDS	25	Mouse									RES	17	Mouse						SS vs RES		>0.9999	0.3741
	Pdgfrβ	CTRL	13	Mouse	Welch's T-test	0.1109	1.665	20.86				Tjp1	CTRL	13	Mouse	One-way Aova	0.1275	2.182	2	36	CTRL vs SS	Bonferroni	0.4594	1.459	36
		CSDS	25	Mouse									SS	9	Mouse						CTRL vs RES		0.155	2.013	36
	Desmin	CTRL	13	Mouse	Welch's T-test	0.8925	0.1367	21.89					RES	17	Mouse						SS vs RES		>0.9999	0.2638	36
		CSDS	25	Mouse								Marveld2	CTRL	13	Mouse	One-way Aova	0.2588	1.404	2	36	CTRL vs SS	Bonferroni	>0.9999	0.02076	36
	Il-6	CTRL	13	Mouse	Mann-Whitney U test	0.8255	161						SS	9	Mouse						CTRL vs RES		0.444	1.478	36
		CSDS	26	Mouse									RES	17	Mouse						SS vs RES		0.6061	1.299	36
	Il-18	CTRL	12	Mouse	Mann-Whitney U test	0.1744	112					Gfap	CTRL	13	Mouse	Kruskal-Wallis test	0.9488	0.1051			CTRL vs SS	Dunn's	>0.9999	0.133
		CSDS	26	Mouse									SS	9	Mouse						CTRL vs RES		>0.9999	0.197
	TNF-α	CTRL	12	Mouse	Mann-Whitney U test	0.9618	148						RES	16	Mouse						SS vs RES		>0.9999	0.3149
		CSDS	25	Mouse								Aqp4	CTRL	13	Mouse	One-way Aova	0.851	0.1621	2	35	CTRL vs SS	Bonferroni	>0.9999	0.09214	35
													SS	9	Mouse						CTRL vs RES		>0.9999	0.4507	35
													RES	16	Mouse						SS vs RES		>0.9999	0.4998	35
												Pdgfrβ	CTRL	13	Mouse	Kruskal-Wallis test	0.1182	4.271			CTRL vs SS	Dunn's	0.4182	1.478
													SS	9	Mouse						CTRL vs RES		0.1439	1.978
													RES	17	Mouse						SS vs RES		>0.9999	0.2128
												Desmin	CTRL	13	Mouse	One-way Aova	0.2974	1.254	2	36	CTRL vs SS	Bonferroni	>0.9999	0.555	36
													SS	9	Mouse						CTRL vs RES		0.9254	1.033	36
													RES	17	Mouse						SS vs RES		0.4215	1.507	36
												Il-6	CTRL	13	Mouse	Kruskal-Wallis test	0.4319	1.679			CTRL vs SS	Dunn's	0.9835	0.9785
													SS	9	Mouse						CTRL vs RES		>0.9999	0.2736
													RES	17	Mouse						SS vs RES		0.6082	1.274
												Il-18	CTRL	12	Mouse	One-way Aova	0.233	1.521	2	34	CTRL vs SS	Bonferroni	0.281	1.725	34
													SS	8	Mouse						CTRL vs RES		>0.9999	0.6085	34
													RES	17	Mouse						SS vs RES		0.606	1.301	34
												TNF-α	CTRL	12	Mouse	Kruskal-Wallis test	0.9913	0.01749			CTRL vs SS	Dunn's	>0.9999	0.1247
													SS	9	Mouse						CTRL vs RES		>0.9999	0.1006
													RES	17	Mouse						SS vs RES		>0.9999	0.04137
Panel	Gene	Group	N value	Replicate	Statistical test	Factor	P value	F value	df (between)	df (within)	Post-Hoc	Test					P value
1E	Cldn5	SE - CTRL	9	Mouse	Two-way Anova	Interaction	**0.0066	5.433	2	65	Tukey	CTRL:Menard et al., 2017 vs. CTRL:Enriched Environment					>0,9999
		SE - SS	14	Mouse		Stress	0.2884	1.267	2	65		CTRL:Menard et al., 2017 vs. SS:Menard et al., 2017					0.0798
		SE - RES	10	Mouse		Environment	**** <0.0001	19.97	1	65		CTRL:Menard et al., 2017 vs. SS:Enriched Environment					0.4973
		EE - CTRL	13	Mouse								CTRL:Menard et al., 2017 vs. RES:Menard et al., 2017					0.9739
		EE - SS	9	Mouse								CTRL:Menard et al., 2017 vs. RES:Enriched Environment					0.2378
		EE - RES	17	Mouse								CTRL:Enriched Environment vs. SS:Menard et al., 2017					*0,0444
												CTRL:Enriched Environment vs. SS:Enriched Environment					0.4216
												CTRL:Enriched Environment vs. RES:Menard et al., 2017					0.9646
												CTRL:Enriched Environment vs. RES:Enriched Environment					0.158
												SS:Menard et al., 2017 vs. SS:Enriched Environment					***0,0002
												SS:Menard et al., 2017 vs. RES:Menard et al., 2017					0.3558
												SS:Menard et al., 2017 vs. RES:Enriched Environment					****<0,0001
												SS:Enriched Environment vs. RES:Menard et al., 2017					0.1216
												SS:Enriched Environment vs. RES:Enriched Environment					>0,9999
												RES:Menard et al., 2017 vs. RES:Enriched Environment					*0,0263
Panel	Gene	Group	N value	Replicate	Statistical test	Factor	P value	F value	df (between)	df (within)	Post-Hoc	Test					P value
1E	Fgf2	SE - CTRL	10	Mouse	Two-way Anova	Interaction	0.8592	0.152	2	69	Tukey	CTRL:Menard et al., 2017 vs. CTRL:Enriched Environment					>0,9999
		SE - SS	15	Mouse		Stress	0.1322	2.084	2	69		CTRL:Menard et al., 2017 vs. SS:Menard et al., 2017					0.8871
		SE - RES	11	Mouse		Environment	0.4594	0.5534	1	69		CTRL:Menard et al., 2017 vs. SS:Enriched Environment					0.7051
		EE - CTRL	13	Mouse								CTRL:Menard et al., 2017 vs. RES:Menard et al., 2017					0.9736
		EE - SS	9	Mouse								CTRL:Menard et al., 2017 vs. RES:Enriched Environment					0.596
		EE - RES	17	Mouse								CTRL:Enriched Environment vs. SS:Menard et al., 2017					0.8516
												CTRL:Enriched Environment vs. SS:Enriched Environment					0.6516
												CTRL:Enriched Environment vs. RES:Menard et al., 2017					0.9652
												CTRL:Enriched Environment vs. RES:Enriched Environment					0.511
												SS:Menard et al., 2017 vs. SS:Enriched Environment					0.9953
												SS:Menard et al., 2017 vs. RES:Menard et al., 2017					0.9998
												SS:Menard et al., 2017 vs. RES:Enriched Environment					0.9931
												SS:Enriched Environment vs. RES:Menard et al., 2017					0.9773
												SS:Enriched Environment vs. RES:Enriched Environment					>0,9999
												RES:Menard et al., 2017 vs. RES:Enriched Environment					0.9664
Panel	Gene	Group	N value	Replicate	Statistical test	Factor	P value	F value	df (between)	df (within)	Post-Hoc	Test					P value
1E	Il-6	SE - CTRL	9	Mouse	Two-way Anova	Interaction	0.3187	1.164	2	65	Tukey	CTRL:Menard et al., 2017 vs. CTRL:Enriched Environment					>0,9999
		SE - SS	14	Mouse		Stress	0.3669	1.018	2	65		CTRL:Menard et al., 2017 vs. SS:Menard et al., 2017					0.3733
		SE - RES	12	Mouse		Environment	*0.0318	4.812	1	65		CTRL:Menard et al., 2017 vs. SS:Enriched Environment					>0,9999
		EE - CTRL	13	Mouse								CTRL:Menard et al., 2017 vs. RES:Menard et al., 2017					0.9311
		EE - SS	9	Mouse								CTRL:Menard et al., 2017 vs. RES:Enriched Environment					0.9804
		EE - RES	17	Mouse								CTRL:Enriched Environment vs. SS:Menard et al., 2017					0.2831
												CTRL:Enriched Environment vs. SS:Enriched Environment					>0,9999
												CTRL:Enriched Environment vs. RES:Menard et al., 2017					0.9078
												CTRL:Enriched Environment vs. RES:Enriched Environment					0.9713
												SS:Menard et al., 2017 vs. SS:Enriched Environment					0.3275
												SS:Menard et al., 2017 vs. RES:Menard et al., 2017					0.909
												SS:Menard et al., 2017 vs. RES:Enriched Environment					*0,0326
												SS:Enriched Environment vs. RES:Menard et al., 2017					0.9059
												SS:Enriched Environment vs. RES:Enriched Environment					0.989
												RES:Menard et al., 2017 vs. RES:Enriched Environment					0.4449
Panel	Protein	Group	N value	Replicate	Statistical test	P value	F value/KW statistic	df (between)	df (within)	Post-Hoc	Test	P value
1G	SI Ratio	CTRL	5	Mouse	One-way Anova	**0.0017	11.34			Tukey	CTRL vs. SS	*0.0162
		SS	5	Mouse							CTRL vs. RES	0.4096
		RES	5	Mouse							SS vs. RES	**0.0016
Panel	Protein	Group	N value	Replicate	Statistical test	P value	F value/KW statistic	df (between)	df (within)	Post-Hoc	Test	P value
1G	Cldn5/Cd31 (% CTRL)	CTRL	5	Mouse	One-way Anova	0.1263	2.471			Tukey	CTRL vs. SS	0.1439
		SS	5	Mouse							CTRL vs. RES	0.9615
		RES	5	Mouse							SS vs. RES	0.2184
Panel	Protein	Group	N value	Replicate	Statistical test	P value	F value/KW statistic	df (between)	df (within)	Post-Hoc	Test	P value
1G	Fgf2 (% CTRL)	CTRL	5	Mouse	One-way Anova	0.1322	4.02			Tukey	CTRL vs. SS	0.1687
		SS	5	Mouse							CTRL vs. RES	0.4127
		RES	5	Mouse							SS vs. RES	>0.9999
						P value
	Fgf2 (% CTRL)	CTRL	5	Mouse	Two-tailed t-test	*0.0317	2.201
		STRESS	10	Mouse
Panel	X-axis	Y-axis	Group	N value	Replicate	Statistical test	Pearson r	P-value
1G	Cldn5/Cd31 (% CTRL)	Fgf2 (% CTRL)	CTRL	5	Mouse	Linear regression	-0.4882	0.0648
			SS	5	Mouse
			RES	5	Mouse

## Sheet: Fig. 2
Panel	Behavior	Group	N value	Replicate	Statistical test	Factor	P value	F value	df (between)	df (within)	Multiple Comparisons	Test	p value	t/Z value	df
2B	Time open arm	SE CTRL	8	Mouse	Two-way ANOVA	Interaction	0.1511	2.116	1	58	Bonferroni	SE-CTRL vs. EE-CTRL	0.2518	2.08	58
		EE CTRL	22	Mouse		Stress	0.4541	0.568	1	58		SE-CTRL vs SE-SCVS	>0.9999	1.296	58
		SE CVS	9	Mouse		Environment	****<0.0001	19.95	1	58		SE-CTRL vs. EE-SCVS	0.0748	2.579	58
		EE CVS	23	Mouse								EE-CTRL vs. SE-SCVS	**0.0024	3.761	58
												EE-CTRL vs. EE-SCVS	>0.9999	0.6701	58
												SE-SCVS vs. EE-SCVS	***0.0004	4.293	58
Panel	Behavior	Group	N value	Replicate	Statistical test	Factor	P value	F value	df (between)	df (within)	Multiple Comparisons	Test	p value	t/Z value	df
2B	Total locomotion	SE CTRL	8	Mouse	Two-way ANOVA	Interaction	0.9962	2.293e-05	1	60	Bonferroni	SE-CTRL vs. EE-CTRL	>0.9999	0.9197	60
		EE CTRL	24	Mouse		Stress	0.3801	0.7818	1	60		SE-CTRL vs SE-SCVS	>0.9999	0.5185	60
		SE CVS	9	Mouse		Environment	0.1863	1.787	1	60		SE-CTRL vs. EE-SCVS	>0.9999	0.3142	60
		EE CVS	24	Mouse								EE-CTRL vs. SE-SCVS	0.6879	1.601	60
												EE-CTRL vs. EE-SCVS	>0.9999	0.8541	60
												SE-SCVS vs. EE-SCVS	>0.9999	0.9728	60
heatmap NAc CTRL vs CVS
Panel	gene	Group	N value	Replicate	Statistical test	P value	t/u value	df
2C	Vegfa	CTRL	11	Mouse	Welch's T-test	0.0586	2.006	19.89
		CVS	12	Mouse
	Fgf2	CTRL	11	Mouse	Welch's T-test	0.2	1.326	19.91
		CVS	12	Mouse
	Pdgfb	CTRL	11	Mouse	Welch's T-test	0.3324	1.003	14.32
		CVS	11	Mouse
	Pecam-1	CTRL	11	Mouse	Welch's T-test	*0.0135	2.708	19.99
		CVS	11	Mouse
	FgfR1	CTRL	11	Mouse	Welch's T-test	0.3643	0.9302	18.42
		CVS	12	Mouse
	Angpt2	CTRL	11	Mouse	Welch's T-test	*0.0178	2.574	20.7
		CVS	12	Mouse
	Cldn5	CTRL	11	Mouse	Welch's T-test	**0.0088	2.995	15.53
		CVS	12	Mouse
	Ocln	CTRL	11	Mouse	Welch's T-test	*0.0338	2.326	15.71
		CVS	12	Mouse
	Tjp1	CTRL	11	Mouse	Welch's T-test	0.2561	1.17	19.74
		CVS	12	Mouse
	Marveld2	CTRL	11	Mouse	Welch's T-test	0.1125	1.1658	20.62
		CVS	12	Mouse
	Gfap	CTRL	10	Mouse	Mann-Whitney U test	0.1145	32
		CVS	11	Mouse
	Aqp4	CTRL	10	Mouse	Welch's T-test	0.8786	0.1152	16.06
		CVS	11	Mouse
	Pdgfrβ	CTRL	11	Mouse	Welch's T-test	0.2316	1.232	20.9
		CVS	12	Mouse
	Desmin	CTRL	11	Mouse	Welch's T-test	0.4123	0.8396	17.77
		CVS	12	Mouse
	Il-6	CTRL	10	Mouse	Welch's T-test	0.2659	1.152	16.21
		CVS	12	Mouse
	Il-18	CTRL	11	Mouse	Welch's T-test	0.4281	0.8114	17.29
		CVS	12	Mouse
	TNF-α	CTRL	11	Mouse	Mann-Whitney U test	0.4385	48
		CVS	12	Mouse
heatmap PFC CTRL vs CVS
Panel	gene	Group	N value	Replicate	Statistical test	P value	t/u value	df
2C	Vegfa	CTRL	12	Mouse	Welch's T-test	0.1812	1.396	16.39
		CVS	12	Mouse
	Fgf2	CTRL	12	Mouse	Welch's T-test	0.1427	1.524	20.53
		CVS	11	Mouse
	Pdgfb	CTRL	12	Mouse	Welch's T-test	0.4055	0.851	18.79
		CVS	12	Mouse
	Pecam-1	CTRL	12	Mouse	Welch's T-test	0.745	0.3301	18.36
		CVS	12	Mouse
	FgfR1	CTRL	12	Mouse	Welch's T-test	0.1319	1.472	19.64
		CVS	12	Mouse
	Angpt2	CTRL	12	Mouse	Welch's T-test	0.8625	0.1755	19.69
		CVS	10	Mouse
	Cldn5	CTRL	12	Mouse	Welch's T-test	0.1812	1.396	16.39
		CVS	12	Mouse
	Ocln	CTRL	12	Mouse	Welch's T-test	0.5716	0.5746	21.13
		CVS	12	Mouse
	Tjp1	CTRL	12	Mouse	Welch's T-test	0.3734	0.9121	18.62
		CVS	12	Mouse
	Marveld2	CTRL	12	Mouse	Welch's T-test	0.8068	0.2476	21.17
		CVS	12	Mouse
	Gfap	CTRL	11	Mouse	Mann-Whitney U test	0.9279	64
		CVS	12	Mouse
	Aqp4	CTRL	12	Mouse	Welch's T-test	0.8314	0.2155	21.99
		CVS	12	Mouse
	Pdgfrβ	CTRL	12	Mouse	Welch's T-test	0.5549	0.6	20.98
		CVS	11	Mouse
	Desmin	CTRL	12	Mouse	Welch's T-test	0.535	0.6341	15.97
		CVS	12	Mouse
	Il-6	CTRL	12	Mouse	Welch's T-test	0.3742	0.9072	21.72
		CVS	12	Mouse
	Il-18	CTRL	12	Mouse	Welch's T-test	0.7037	0.3859	19.82
		CVS	12	Mouse
	TNF-α	CTRL	12	Mouse	Welch's T-test	0.8483	0.1936	20.92
		CVS	11	Mouse
Panel	Gene	Group	N value	Replicate	Statistical test	Factor	P value	F value	df (between)	df (within)	Post-Hoc	Test					P value
2D	Cldn5	SE - CTRL	10	Mouse	Two-way Anova	Interaction	0.0899	3.025	1	39	Tukey	CTRL:Standard Environment vs. CTRL:Enriched Environment					0.8684
		SE - STRESS	10	Mouse		Stress	**0.0024	10.58	1	39		CTRL:Standard Environment vs. CVS:Standard Environment					**0,0096
		EE - CTRL	12	Mouse		Environment	0.5276	0.4063	1	39		CTRL:Standard Environment vs. CVS:Enriched Environment					0.2781
		EE - STRESS	12	Mouse								CTRL:Enriched Environment vs. CVS:Standard Environment					*0,0387
												CTRL:Enriched Environment vs. CVS:Enriched Environment					0.6675
												CVS:Standard Environment vs. CVS:Enriched Environment					0.3344
Panel	Gene	Group	N value	Replicate	Statistical test	Factor	P value	F value	df (between)	df (within)	Post-Hoc	Test					P value
2D	Fgf2	SE - CTRL	10	Mouse	Two-way Anova	Interaction	0.082	3.186	1	39	Tukey	CTRL:Standard Environment vs. CTRL:Enriched Environment					>0,9999
		SE - STRESS	10	Mouse		Stress	0.3761	0.8016	1	39		CTRL:Standard Environment vs. CVS:Standard Environment					0.2736
		EE - CTRL	12	Mouse		Environment	0.082	3.186	1	39		CTRL:Standard Environment vs. CVS:Enriched Environment					0.9241
		EE - STRESS	12	Mouse								CTRL:Enriched Environment vs. CVS:Standard Environment					0.2386
												CTRL:Enriched Environment vs. CVS:Enriched Environment					0.9142
												CVS:Standard Environment vs. CVS:Enriched Environment					0.0757
Panel	Protein	Group	N value	Replicate	Statistical test	P value	t value	df
2G	Cldn5/Cd31 (% CTRL)	CTRL	8	Mouse	Welch's T-test	0.8719	0.1639	15.91
		CVS	10	Mouse
Panel	Protein	Group	N value	Replicate	Statistical test	P value	t value	df
2G	Fgf2 (% CTRL)	CTRL	8	Mouse	Welch's T-test	0.6326	0.4878	15.32
		CVS	11	Mouse
Panel	X-axis	Y-axis	Group	N value	Replicate	Statistical test	Pearson R	P-value
2G	Cldn5/Cd31 (% CTRL)	Fgf2 (% CTRL)	CTRL	6	Mouse	Linear regression	-0.1746	0.553
			STRESS	9	Mouse

## Sheet: Fig. 3
Panel	Behavior	Group	N value	Replicate	Statistical test	Factor	P value	F value	df (between)	df (within)	Multiple Comparisons	Test	p value	t/Z value	df
1B	SI Ratio	SE - CTRL	10	Mouse	Two-way Anova	Interaction	*0.0196	5.647	1	92	Bonferroni	SE-CTRL vs. PE-CTRL	0.1116	2.396	92
		PE - CTRL	18	Mouse		Row	****<0.0001	32.1	1	92		SE-CTRL vs SE-CSDS	****<0.0001	5.06	92
		SE - CSDS	27	Mouse		Column	0.0961	2.826	1	92		SE-CTRL vs. PE-CSDS	****<0.0001	4.851	92
		PE - CSDS	41	Mouse								PE-CTRL vs. SE-CSDS	*0.018	3.05	92
												PE-CTRL vs. PE-CSDS	*0.0483	2.709	92
												SE-CSDS vs. PE-CSDS	>0.9999	0.6533	92
Panel	Behavior	Group	N value	Replicate	Statistical test	Factor	P value	F value	df (between)	df (within)	Multiple Comparisons	Test	p value	t/Z value	df
1C	Corner time	SE - CTRL	9	Mouse	Two-way Anova	Interaction	*0.0104	6.857	1	90	Bonferroni	SE-CTRL vs. PE-CTRL	>0.9999	0.4908	90
		EE - CTRL	18	Mouse		Row	**0.0023	9.853	1	90		SE-CTRL vs SE-CSDS	**0.0035	3.566	90
		SE - CSDS	17	Mouse		Column	***0.0008	11.94	1	90		SE-CTRL vs. PE-CSDS	>0.9999	0.2056	90
		EE - CSDS	41	Mouse								PE-CTRL vs. SE-CSDS	****<0.0001	5.151	90
												PE-CTRL vs. PE-CSDS	>0.9999	0.4409	90
												SE-CSDS vs. PE-CSDS	****<0.0001	5.803	90
Panel	Behavriour	Group	N value	Replicate	Statistical test	P value	t value	df
3E	Total distance	CTRL	18	Mouse	Welch's t-test	*0.0241	2.353	36.23
		CSDS	40	Mouse
Panel	Behavriour	Group	N value	Replicate	Statistical test	P value	F value	df (between)	df (within)	Post-Hoc	Test	P value	t/Z value	df
3F left	Light cycle running	CTRL	18	Mouse	One-way ANOVA	**0.0061	5.601	2	55	Bonferroni	CTRL vs. SS	0.2783	1.711	55
		SS	19	Mouse							CTRL vs. RES	**0.0044	3.346	55
		RES	21	Mouse							SS vs. RES	0.3343	1.618	55
Panel	Behavriour	Group	N value	Replicate	Statistical test	P value	F value	df (between)	df (within)	Post-Hoc	Test	P value	t/Z value	df
3F right	Dark cycle running	CTRL	18	Mouse	One-way ANOVA	0.5081	0.6854	2	56	Bonferroni	CTRL vs. SS	>0.9999	0.7329	56
		SS	19	Mouse							CTRL vs. RES	0.7494	1.163	56
		RES	22	Mouse							SS vs. RES	>0.9999	0.4104	56
Panel	Behavior	Group	N value	Replicate	Statistical test	Factor	P value	F value	df (between)	df (within)	Posthoc	Test	P value	t/Z value	df
3G	Running post-CSDS	CTRL	18	Mouse	Two-way ANOVA	Interaction	>0.9999	0.1652	1	35	Bonferroni	CTRL vs. SS	****<0.0001	12.82	3360
		SS	19	Mouse		Time	0.2129	3.522	1	35		CTRL vs. RES	****<0.0001	16.06	3360
		RES	22	Mouse		Stress	<0.0001	25.79	1	35		SS vs. RES	*0.0136	2.841	3360
heatmap NAc CTRL vs CSDS											heatmap NAc CTRL vs SS vs RES
Panel	gene	Group	N value	Replicate	Statistical test	P value	t/u value	df			Panel	gene	Group	N value	Replicate	Statistical test	P value	F value/KW statistic	df (between)	df (within)	Multiple Comparisons	Test	p value	t/Z value	df
3H	Vegfa	CTRL	12	Mouse	Mann-Whitney U test	0.7857	141				3H	Vegfa	CTRL	12	Mouse	One-way Aova	0.8848	0.1229	2	34	CTRL vs SS	Bonferroni	>0.999	0.3224	34
		CSDS	25	Mouse									SS	13	Mouse						CTRL vs RES		>0.999	0.1595	34
	Fgf2	CTRL	12	Mouse	Mann-Whitney U test	0.9363	147						RES	12	Mouse						SS vs RES		>0.999	0.4851	34
		CSDS	25	Mouse								Fgf2	CTRL	12	Mouse	Kruskal-Wallis Test	0.3316	2.208			CTRL vs SS	Dunn's	>0.999	0.6064
	Pdgfb	CTRL	12	Mouse	Welch's T-test	0.6933	0.3983	29.47					SS	13	Mouse						CTRL vs RES		>0.999	0.8734
		CSDS	25	Mouse									RES	11	Mouse						SS vs RES		0.4146	1.482
	Pecam-1	CTRL	12	Mouse	Welch's T-test	0.952	0.06092	20.81				Pdgfb	CTRL	12	Mouse	Kruskal-Wallis Test	0.6505	0.8601			CTRL vs SS	Dunn's	>0.999	0.8417
		CSDS	25	Mouse									SS	13	Mouse						CTRL vs RES		>0.999	0.09429
	FgfR1	CTRL	12	Mouse	Mann-Whitney U test	>0.9999	144						RES	12	Mouse						SS vs RES		>0.999	0.7456
		CSDS	24	Mouse								Pecam-1	CTRL	12	Mouse	One-way Aova	0.9641	0.03655	2	34	CTRL vs SS	Bonferroni	>0.999	0.07271	34
	Angpt2	CTRL	12	Mouse	Welch's T-test	0.5234	0.645	33.02					SS	13	Mouse						CTRL vs RES		>0.999	0.187	34
		CSDS	25	Mouse									RES	12	Mouse						SS vs RES		>0.999	0.2634	34
	Cldn5	CTRL	11	Mouse	Welch's T-test	**0.005	3.005	33.89				FgfR1	CTRL	12	Mouse	Kruskal-Wallis Test	0.495	1.407			CTRL vs SS	Dunn's	>0.999	0.5563
		CSDS	25	Mouse									SS	13	Mouse						CTRL vs RES		>0.999	0.6305
	Ocln	CTRL	12	Mouse	Welch's T-test	0.6333	0.4824	28.3					RES	11	Mouse						SS vs RES		0.7069	1.186
		CSDS	25	Mouse								Angpt2	CTRL	12	Mouse	One-way Aova	0.8513	0.1617	2	34	CTRL vs SS	Bonferroni	>0.9999	0.3786	34
	Tjp1	CTRL	12	Mouse	Welch's T-test	0.9073	0.1185	14.82					SS	13	Mouse						CTRL vs RES		>0.9999	0.5582	34
		CSDS	23	Mouse									RES	12	Mouse						SS vs RES		>0.9999	0.1906	34
	Marveld2	CTRL	11	Mouse	Welch's T-test	0.1138	1.626	32.06				Cldn5	CTRL	11	Mouse	One-way Aova	*0.0206	4.376	2	33	CTRL vs SS	Bonferroni	0.6443	1.265	33
		CSDS	24	Mouse									SS	13	Mouse						CTRL vs RES		*0.018	2.938	33
	Gfap	CTRL	11	Mouse	Welch's T-test	0.0542	2.003	30.46					RES	12	Mouse						SS vs RES		0.2586	1.769	33
		CSDS	25	Mouse								Ocln	CTRL	12	Mouse	One-way Aova	0.4562	0.8032	2	34	CTRL vs SS	Bonferroni	>0.9999	0.186	34
	Aqp4	CTRL	10	Mouse	Welch's T-test	0.43	0.7991	33					SS	13	Mouse						CTRL vs RES		0.9967	0.9837	34
		CSDS	25	Mouse									RES	12	Mouse						SS vs RES		0.7279	1.189	34
	Pdgfrβ	CTRL	12	Mouse	Welch's T-test	0.1354	1.54	26.67				Tjp1	CTRL	12	Mouse	One-way Aova	0.9599	0.04099	2	32	CTRL vs SS	Bonferroni	>0.9999	0.2431	32
		CSDS	25	Mouse									SS	12	Mouse						CTRL vs RES		>0.9999	0.01301	32
	Desmin	CTRL	12	Mouse	Mann-Whitney U test	0.9363	147						RES	11	Mouse						SS vs RES		>0.9999	0.2508	32
		CSDS	25	Mouse								Marveld2	CTRL	11	Mouse	One-way Aova	0.3627	1.048	2	31	CTRL vs SS	Bonferroni	>0.9999	0.5136	31
	Il-6	CTRL	12	Mouse	Mann-Whitney U test	0.5753	132						SS	12	Mouse						CTRL vs RES		0.4915	1.426	31
		CSDS	25	Mouse									RES	11	Mouse						SS vs RES		>0.9999	0.9432	31
	Il-18	CTRL	12	Mouse	Welch's T-test	0.4073	0.8445	22.43				Gfap	CTRL	11	Mouse	One-way Aova	0.2656	1.38	2	33	CTRL vs SS	Bonferroni	0.6066	1.301	33
		CSDS	25	Mouse									SS	13	Mouse						CTRL vs RES		0.38	1.567	33
	TNF-α	CTRL	12	Mouse	Mann-Whitney U test	0.1603	106						RES	12	Mouse						SS vs RES		>0.9999	0.3023	33
		CSDS	25	Mouse								Aqp4	CTRL	10	Mouse	One-way Aova	0.3803	0.9965	2	32	CTRL vs SS	Bonferroni	>0.9999	0.1842	32
													SS	13	Mouse						CTRL vs RES		0.6436	1.266	32
													RES	12	Mouse						SS vs RES		0.7628	1.161	32
												Pdgfrβ	CTRL	12	Mouse	One-way Aova	0.375	1.01	2	34	CTRL vs SS	Bonferroni	0.573	1.334	34
													SS	13	Mouse						CTRL vs RES		0.836	1.101	34
													RES	12	Mouse						SS vs RES		>0.9999	0.2115	34
												Desmin	CTRL	12	Mouse	Kruskal-Wallis Test	0.935	0.1345			CTRL vs SS	Dunn's	>0.9999	0.08432
													SS	13	Mouse						CTRL vs RES		>0.9999	0.264
													RES	12	Mouse						SS vs RES		>0.9999	0.3536
												Il-6	CTRL	12	Mouse	One-way Aova	0.4354	0.8535	2	32	CTRL vs SS	Bonferroni	0.9849	0.9927	32
													SS	12	Mouse						CTRL vs RES		0.687	1.226	32
													RES	11	Mouse						SS vs RES		>0.9999	0.2555	32
												Il-18	CTRL	12	Mouse	One-way Aova	0.7151	0.3387	2	34	CTRL vs SS	Bonferroni	>0.9999	0.7187	34
													SS	13	Mouse						CTRL vs RES		>0.9999	0.7115	34
													RES	12	Mouse						SS vs RES		>0.9999	0.006816	34
												TNF-α	CTRL	12	Mouse	One-way Aova	0.1075	2.383	2	34	CTRL vs SS	Bonferroni	>0.9999	0.6496	34
													SS	13	Mouse						CTRL vs RES		0.1231	2.124	34
													RES	12	Mouse						SS vs RES		0.4159	1.517	34
heatmap PFC CTRL vs CSDS											heatmap PFC CTRL vs SS vs RES
Panel	gene	Group	N value	Replicate	Statistical test	P value	t/u value	df			Panel	gene	Group	N value	Replicate	Statistical test	P value	F value/KW statistic	df (between)	df (within)	Multiple Comparisons	test	p value	t/Z value	df
3H	Vegfa	CTRL	12	Mouse	Welch's T-test	0.4456	0.7764	22.46			3H	Vegfa	CTRL	12	Mouse	One-way Aova	0.315	1.196	2	33	CTRL vs SS	Bonferroni	>0.9999	0.2576	33
		CSDS	25	Mouse									SS	12	Mouse						CTRL vs RES		0.7251	1.192	33
	Fgf2	CTRL	12	Mouse	Mann-Whitney U-test	0.2373	108						RES	12	Mouse						SS vs RES		0.4697	1.45	33
		CSDS	24	Mouse								Fgf2	CTRL	12	Mouse	One-way Aova	0.5085	0.6903	2	33	CTRL vs SS	Bonferroni	>0.9999	0.4894	33
	Pdgfb	CTRL	12	Mouse	Welch's T-test	0.3288	0.9904	34.89					SS	12	Mouse						CTRL vs RES		0.7514	1.17	33
		CSDS	25	Mouse									RES	12	Mouse						SS vs RES		>0.9999	0.6804	33
	Pecam-1	CTRL	12	Mouse	Welch's T-test	0.5289	0.6373	29.4				Pdgfb	CTRL	12	Mouse	One-way Aova	0.5747	0.563	2	34	CTRL vs SS	Bonferroni	0.9271	1.033	34
		CSDS	25	Mouse									SS	13	Mouse						CTRL vs RES		>0.9999	0.3169	34
	FgfR1	CTRL	11	Mouse	Mann-Whitney U-test	0.0535	81						RES	12	Mouse						SS vs RES		>0.9999	0.7095	34
		CSDS	25	Mouse								Pecam-1	CTRL	12	Mouse	One-way Aova	0.6959	0.3664	2	34	CTRL vs SS	Bonferroni	>0.9999	0.8031	34
	Angpt2	CTRL	11	Mouse	Mann-Whitney U-test	0.0784	82						SS	13	Mouse						CTRL vs RES		>0.9999	0.1545	34
		CSDS	23	Mouse									RES	12	Mouse						SS vs RES		>0.9999	0.6455	34
	Cldn5	CTRL	11	Mouse	Welch's T-test	**0.0012	3.528	33.99				FgfR1	CTRL	11	Mouse	Kruskal-Wallis test	0.0939	4.732			CTRL vs SS	Dunn's	0.6313	1.252
		CSDS	25	Mouse									SS	13	Mouse						CTRL vs RES		0.0895	2.172
	Ocln	CTRL	12	Mouse	Welch's T-test	0.9594	0.05142	26.9					RES	12	Mouse						SS vs RES		0.9763	0.9834
		CSDS	25	Mouse								Angpt2	CTRL	11	Mouse	One-way Aova	1.704	0.1985	2	31	CTRL vs SS	Bonferroni	0.4403	1.488	31
	Tjp1	CTRL	12	Mouse	Welch's T-test	0.6958	0.3948	29.26					SS	12	Mouse						CTRL vs RES		0.2977	1.7	31
		CSDS	25	Mouse									RES	11	Mouse						SS vs RES		>0.9999	0.2478	31
	Marveld2	CTRL	12	Mouse	Welch's T-test	0.7103	0.3768	20.06				Cldn5	CTRL	11	Mouse	One-way Aova	*0.0233	4.22	2	33	CTRL vs SS	Bonferroni	0.2227	1.844	33
		CSDS	25	Mouse									SS	13	Mouse						CTRL vs RES		*0.0207	2.882	33
	Gfap	CTRL	11	Mouse	Welch's T-test	0.146	1.492	30.48					RES	12	Mouse						SS vs RES		0.8147	1.118	33
		CSDS	25	Mouse								Ocln	CTRL	12	Mouse	One-way Aova	0.6338	0.4623	2	34	CTRL vs SS	Bonferroni	>0.9999	0.5025	34
	Aqp4	CTRL	12	Mouse	Welch's T-test	0.9879	0.01533	28.86					SS	13	Mouse						CTRL vs RES		>0.9999	0.4489	34
		CSDS	25	Mouse									RES	12	Mouse						SS vs RES		>0.9999	0.9603	34
	Pdgfrβ	CTRL	12	Mouse	Welch's T-test	0.5919	0.5424	27.76				Tjp1	CTRL	12	Mouse	One-way Aova	0.9132	0.09101	2	34	CTRL vs SS	Bonferroni	>0.9999	0.186	34
		CSDS	25	Mouse									SS	13	Mouse						CTRL vs RES		>0.9999	0.4251	34
	Desmin	CTRL	12	Mouse	Welch's T-test	0.1578	1.451	28.36					RES	12	Mouse						SS vs RES		>0.9999	0.2476	34
		CSDS	25	Mouse								Marveld2	CTRL	12	Mouse	One-way Aova	0.6898	0.3754	2	34	CTRL vs SS	Bonferroni	>0.9999	0.03222	34
	Il-6	CTRL	11	Mouse	Welch's T-test	0.2844	1.095	23.9					SS	13	Mouse						CTRL vs RES		>0.9999	0.7285	34
		CSDS	24	Mouse									RES	12	Mouse						SS vs RES		>0.9999	0.7751	34
	Il-18	CTRL	12	Mouse	Welch's T-test	0.1506	1.478	27.65				Gfap	CTRL	11	Mouse	One-way Aova	0.4775	0.7559	2	33	CTRL vs SS	Bonferroni	0.9907	0.9882	33
		CSDS	25	Mouse									SS	13	Mouse						CTRL vs RES		0.7813	1.145	33
	TNF-α	CTRL	12	Mouse	Welch's T-test	0.1686	1.419	24.26					RES	12	Mouse						SS vs RES		>0.9999	0.1826	33
		CSDS	25	Mouse								Aqp4	CTRL	12	Mouse	One-way Aova	0.9771	0.02316	2	34	CTRL vs SS	Bonferroni	>0.9999	0.09119	34
													SS	13	Mouse						CTRL vs RES		>0.9999	0.1212	34
													RES	12	Mouse						SS vs RES		>0.9999	0.2148	34
												Pdgfrβ	CTRL	12	Mouse	Kruskal-Wallis test	0.1686	3.56			CTRL vs SS	Dunn's	0.8338	1.085
													SS	13	Mouse						CTRL vs RES		>0.9999	0.7944
													RES	12	Mouse						SS vs RES		0.1806	1.879
												Desmin	CTRL	12	Mouse	One-way Aova	0.2062	1.655	2	34	CTRL vs SS	Bonferroni	0.2626	1.759	34
													SS	13	Mouse						CTRL vs RES		>0.9999	0.4985	34
													RES	12	Mouse						SS vs RES		0.6586	1.251	34
												Il-6	CTRL	11	Mouse	One-way Aova	0.5684	0.575	2	32	CTRL vs SS	Bonferroni	0.8875	1.063	32
													SS	12	Mouse						CTRL vs RES		>0.9999	0.6764	32
													RES	12	Mouse						SS vs RES		>0.9999	0.3951	32
												Il-18	CTRL	12	Mouse	One-way Aova	*0.0460	3.386	2	33	CTRL vs SS	Bonferroni	0.1166	2.151	33
													SS	13	Mouse						CTRL vs RES		>0.9999	0.1966	33
													RES	11	Mouse						SS vs RES		0.0833	2.302	33
												TNF-α	CTRL	12	Mouse	One-way Aova	0.3772	1.004	2	34	CTRL vs SS	Bonferroni	0.5178	1.393	34
													SS	13	Mouse						CTRL vs RES		>0.9999	0.9316	34
													RES	12	Mouse						SS vs RES		>0.9999	0.4431	34
Panel	Gene	Group	N value	Replicate	Statistical test	Factor	P value	F value	df (between)	df (within)	Post-Hoc	Test				P value
3I	Cldn5	SE - CTRL	9	Mouse	Two-way Anova	Interaction	**0.0037	6.125	2	63	Tukey	CTRL:Menard et al., 2017 vs. CTRL:Physical Exercise				>0,9999
		SE - SS	14	Mouse		Stress	*0.0134	4.621	2	63		CTRL:Menard et al., 2017 vs. SS:Menard et al., 2017				*0,0138
		SE - RES	10	Mouse		Physical exercise	****<0.0001	25.01	1	63		CTRL:Menard et al., 2017 vs. SS:Physical Exercise				0.8306
		PE - CTRL	11	Mouse								CTRL:Menard et al., 2017 vs. RES:Menard et al., 2017				0.9351
		PE - SS	13	Mouse								CTRL:Menard et al., 2017 vs. RES:Physical Exercise				0.0681
		PE - RES	12	Mouse								CTRL:Physical Exercise vs. SS:Menard et al., 2017				**0,0075
												CTRL:Physical Exercise vs. SS:Physical Exercise				0.7945
												CTRL:Physical Exercise vs. RES:Menard et al., 2017				0.9207
												CTRL:Physical Exercise vs. RES:Physical Exercise				*0,0458
												SS:Menard et al., 2017 vs. SS:Physical Exercise				****<0,0001
												SS:Menard et al., 2017 vs. RES:Menard et al., 2017				0.1461
												SS:Menard et al., 2017 vs. RES:Physical Exercise				****<0,0001
												SS:Physical Exercise vs. RES:Menard et al., 2017				0.2212
												SS:Physical Exercise vs. RES:Physical Exercise				0.4793
												RES:Menard et al., 2017 vs. RES:Physical Exercise				**0,0031
Panel	Gene	Group	N value	Replicate	Statistical test	Factor	P value	F value	df (between)	df (within)	Post-Hoc	Test				P value
3I	Il-6	SE - CTRL	10	Mouse	Two-way Anova	Interaction	0.0923	2.475	2	63	Tukey	CTRL:Menard et al., 2017 vs. CTRL:Physical Exercise				>0,9999
		SE - SS	15	Mouse		Stress	0.576	0.5566	2	63		CTRL:Menard et al., 2017 vs. SS:Menard et al., 2017				0.3007
		SE - RES	11	Mouse		Physical exercise	**0.0031	9.43	1	63		CTRL:Menard et al., 2017 vs. SS:Physical Exercise				0.9487
		PE - CTRL	12	Mouse								CTRL:Menard et al., 2017 vs. RES:Menard et al., 2017				0.9104
		PE - SS	12	Mouse								CTRL:Menard et al., 2017 vs. RES:Physical Exercise				0.8808
		PE - RES	11	Mouse								CTRL:Physical Exercise vs. SS:Menard et al., 2017				0.2174
												CTRL:Physical Exercise vs. SS:Physical Exercise				0.9299
												CTRL:Physical Exercise vs. RES:Menard et al., 2017				0.8814
												CTRL:Physical Exercise vs. RES:Physical Exercise				0.8441
												SS:Menard et al., 2017 vs. SS:Physical Exercise				*0,0205
												SS:Menard et al., 2017 vs. RES:Menard et al., 2017				0.8828
												SS:Menard et al., 2017 vs. RES:Physical Exercise				*0,0123
												SS:Physical Exercise vs. RES:Menard et al., 2017				0.3372
												SS:Physical Exercise vs. RES:Physical Exercise				0.9999
												RES:Menard et al., 2017 vs. RES:Physical Exercise				0.2395
Panel	Protein	Group	N value	Replicate	Statistical test	P value	F value	df (between)	df (within)	Post-Hoc	Test	P value	t/Z value	df
3J top left	SI Ratio	CTRL	6	Mouse	One-way ANOVA	**0.0022	8.61	2	18	Bonferroni	CTRL vs. SS	*0.0116	3.288	19
		SS	6	Mouse							CTRL vs. RES	>0.9999	0.2605	19
		RES	10	Mouse							SS vs. RES	**0.0027	3.937	19
Panel	Protein	Group	N value	Replicate	Statistical test	P value	F value	df (between)	df (within)	Post-Hoc	Test	P value	t/Z value	df
3J top right	Cldn5/Cd31 (% CTRL)	CTRL	5	Mouse	One-way ANOVA	0.5364	0.645	2	18	Bonferroni	CTRL vs. SS	0.8139	1.135	18
		SS	6	Mouse							CTRL vs. RES	>0.9999	0.6493	18
		RES	10	Mouse							SS vs. RES	>0.9999	0.6421	18
Panel	Protein	Group	N value	Replicate	Statistical test	P value	F value	df (between)	df (within)	Post-Hoc	Test	P value	t/Z value	df
3J bottom left	Fgf2 (% CTRL)	CTRL	5	Mouse	One-way ANOVA	**0.0048	7.283	2	18	Bonferroni	CTRL vs. SS	*0.0344	2.815	18
		SS	6	Mouse							CTRL vs. RES	**0.0044	3.753	18
		RES	10	Mouse							SS vs. RES	>0.9999	0.6796	18

## Sheet: Fig.4
Panel	Fgf2 intensity	Group	N value	Replicate	Statistical test	P value	t value	df
4D (left)	%GFP	GFP	4	Mouse	Welch's t-test	**0.0067	3.829	6.848
		Fgf2	6	Mouse
Panel	Fgf2 intensity	Group	N value	Replicate	Statistical test	P value	t value	df
4D (right)	%GFP/CD31	GFP	4	Mouse	Welch's t-test	*0.0163	3.291	6.075
		Fgf2	6	Mouse
Panel	Behavior	Group	N value	Replicate	Statistical test	Factor	P value	F value	df (between)	df (within)
4F	SI Ratio	GFP - CTRL	6	Mouse	Two-way Anova	Interaction	0.7861	0.075	1	29
		Fgf2 - CTRL	5	Mouse		Stress	0.0903	3.07	1	29
		GFP - CSDS	12	Mouse		Virus	0.9018	0.01551	1	29
		Fgf2 - CSDS	11	Mouse
Panel	Behavior	Group	N value	Replicate	Statistical test	Factor	P value	F value	df (between)	df (within)	Multiple Comparisons	Test	p value
4H (left)	Time corners	GFP - CTRL	6	Mouse	Two-way Anova	Interaction	0.3029	1.1	1	29	Bonferroni	GFP-CTRL vs. Fgf2-CTRL	0.6228
		Fgf2 - CTRL	5	Mouse		Stress	0.0595	3.846	1	29		GFP-CSDS vs. Fgf2-CSDS	0.2592
		GFP - CSDS	12	Mouse		Virus	0.8282	0.04796	1	29		GFP-CTRL vs. GFP-CSDS	*0.0407
		Fgf2 - CSDS	11	Mouse								Fgf2-CTRL vs. Fgf2-CSDS	0.5267
Panel	Behavior	Group	N value	Replicate	Statistical test	Factor	P value	F value	df (between)	df (within)	Multiple Comparisons	Test	p value
4H (right)	Time corners	GFP - CTRL	5	Mouse	Two-way Anova	Interaction	0.0919	2.61	2	27	Sidak	GFP-CTRL vs. Fgf2-CTRL	0.5961
		Fgf2 - CTRL	5	Mouse		Stress	*0,0338	3.851	2	27		GFP-SS vs. Fgf2-SS	*0,0258
		GFP - SS	6	Mouse		Virus	0.5378	0.3895	1	27		GFP-RES vs. Fgf2-RES	0.6342
		Fgf2 - SS	7	Mouse								GFP CTRL vs. SS	**0,0089
		GFP - RES	6	Mouse								GFP CTRL vs. RES	0.817
		Fgf2 - RES	4	Mouse								GFP SS vs. RES	*0,0453
												Fgf2 CTRL vs. SS	0.927
												Fgf2 CTRL vs. RES	0.878
												Fgf2 SS vs. RES	0.9959
Panel	Fgf2 intensity	Group	N value	Replicate	Statistical test	P value	t value	df
4I (left)	Fgf2 fold change	GFP	17	Mouse	Welch's t-test	****<0,0001	5.659	33
		Fgf2	18	Mouse
Panel	Behavior	Group	N value	Replicate	Statistical test	Factor	P value	F value	df (between)	df (within)	Multiple Comparisons	Test	p value
4I (right)	Fgf2 fold change	GFP - CTRL	6	Mouse	Two-way Anova	Interaction	0.2581	1.419	2	29	Sidak	GFP-CTRL vs. Fgf2-CTRL	***0,0007
		Fgf2 - CTRL	6	Mouse		Stress	0.2521	1.445	2	29		GFP-SS vs. Fgf2-SS	***0,0002
		GFP - SS	6	Mouse		Virus	****<0,0001	27.23	1	29		GFP-RES vs. Fgf2-RES	0.174
		Fgf2 - SS	8	Mouse								GFP CTRL vs. SS	>0,9999
		GFP - RES	5	Mouse								GFP CTRL vs. RES	>0,9999
		Fgf2 - RES	4	Mouse								GFP SS vs. RES	>0,9999
												Fgf2 CTRL vs. SS	>0,9999
												Fgf2 CTRL vs. RES	0.1872
												Fgf2 SS vs. RES	0.1009

## Sheet: Fig. 5
Panel	gene	Group	N value	Replicate	Statistical test	Factor	P value	F value	df (between)	df (within)	Multiple Comparisons	Test	p value	t/Z value	df
1D	Cldn5	TNF-α	30	bEnd.3	Two-way ANOVA	Interaction	0.1017	2.078	4	40	Bonferroni	0h	>0.9999	4.849e-06	9.943
		TNF-α + FGF2	30	bEnd.3		Time	***0.0008	10.13	2.074	20.74		1h	>0.9999	0.7327	9.756
						Treatment	0.3008	1.191	1	10		3h	>0.9999	0.1346	7.288
						Subject	0.4519	1.01	10	40		6h	*0.0119	4.37	7.989
												24h	>0.9999	0.5939	9.9
Panel	gene	Group	N value	Replicate	Statistical test	Factor	P value	F value	df (between)	df (within)	Multiple Comparisons	Test	p value	t/Z value	df
1E	CLDN5	TNF-α	30	HBEC-5i	Two-way ANOVA	Interaction	0.066	2.4	4	40	Bonferroni	0h	>0.9999	0	8.564
		TNF-α + FGF2	30	HBEC-5i		Time	****<0.0001	43.61	2.77	27.7		1h	0.3966	1.957	9.819
						Treatment	*0.0266	6.745	1	10		3h	0.1017	3.045	6.543
						Subject						6h	***0.0004	7.087	8.351
												24h	>0.9999	0.1129	7.302
Panel	measure	Group	N value	Replicate	Statistical test	Factor	P value	F value	df (between)	df (within)	Multiple Comparisons	Test	p value	t/Z value	df
1G	TEER	CTRL	8	bEnd.3	Two-way ANOVA	Interaction	0.1702	1.544	9	36	Bonferroni	CTRL vs. FGF2	0.3947	2.137	5.541
		FGF2	8	bEnd.3		Time	*0,0223	3.99	2.471	29.65		CTRL vs. TNF-α	0.0645	3.741	5.56
		TNF-α	8	bEnd.3		Treatment	***0,0014	14.64	3	12		CTRL vs. FGF2+TNF-α	>0,9999	0.004689	5.363
		TNF-α + FGF2	8	bEnd.3								FGF2 vs. TNF-α	*0,0217	5.363	4.698
												FGF2 vs. FGF2+TNF-α	0.5283	1.827	5.976
												TNF-α vs. FGF2+TNF-α	0.2104	2.886	4.526
Panel	measure	Group	N value	Replicate	Statistical test	Factor	P value	F value	df (between)	df (within)	Multiple Comparisons	Test	p value	t/Z value	df
1H	TEER	CTRL	8	bEnd.3	Two-way ANOVA	Interaction	*0.0164	2.388	9	112	Bonferroni	CTRL vs. FGF2	>0.9999	1.05	112
		FGF2	8	bEnd.3		Time	***0.0009	5.863	3	112		CTRL vs. TNF-α	****<0.0001	4.974	112
		TNF-α	8	bEnd.3		Treatment	****<0.0001	12.84	3	112		CTRL vs. FGF2+TNF-α	>0.9999	0.702	112
		TNF-α + FGF2	8	bEnd.3								FGF2 vs. TNF-α	***0.0009	3.924	112
												FGF2 vs. FGF2+TNF-α	0.4953	1.752	112
												TNF-α vs. FGF2+TNF-α	****<0.0001	5.676	112

## Sheet: Fig. 6
Panel	Behavriour	Group	N value	Replicate	Statistical test	P value	t value	df
5A	p-GSK3b/GSK3b	CTRL	3	HBEC-5i	Welch's t-test	*0.0332	3.514	3.321
		FGF2 (1h)	3	HBEC-5i
Panel	Protein	Group	N value	Replicate	Statistical test	P value	F value	df (between)	df (within)
5A (TNFa)	p-GSK3b/GSK3b	0h	3	HBEC-5i	One-way ANOVA	*0.0113	7.282	3	8
		5min	3	HBEC-5i
		1h	3	HBEC-5i
		6h	3	HBEC-5i
Panel	Protein	Group	N value	Replicate	Statistical test	P value	F value	df (between)	df (within)
5A (FGF2+TNFa)	p-GSK3b/GSK3b	0h	3	HBEC-5i	One-way ANOVA	*0.0118	7.161	3	8
		5min	3	HBEC-5i
		1h	3	HBEC-5i
		6h	3	HBEC-5i
Panel	Behavriour	Group	N value	Replicate	Statistical test	P value	t value	df
5B	p-GSK3b/GSK3b	CTRL	3	HBEC-5i	Welch's t-test	0.0747	2.401	3.972
		FGF2 (1h)	3	HBEC-5i
Panel	Protein	Group	N value	Replicate	Statistical test	P value	F value	df (between)	df (within)
5B (TNFa)	p-GSK3b/GSK3b	0h	3	HBEC-5i	One-way ANOVA	**0.0031	11.2	3	8
		5min	3	HBEC-5i
		1h	3	HBEC-5i
		6h	3	HBEC-5i
Panel	Protein	Group	N value	Replicate	Statistical test	P value	F value	df (between)	df (within)
5B (FGF2+TNFa)	p-GSK3b/GSK3b	0h	3	HBEC-5i	One-way ANOVA	***0.0004	47.15	3	5
		5min	3	HBEC-5i
		1h	3	HBEC-5i
		6h	3	HBEC-5i

## Sheet: Fig. S1
Panel	Behavior	Group	N value	Replicate	Statistical test	P value	F value/KW statistic	df (between)	df (within)	Multiple Comparisons	Test	p value	t/Z value	df
S1A	SI Ratio	CTRL	17	Mouse	One-way ANOVA	****<0.0001	32.51	2	50	Bonferroni	CTRL vs. SS	****<0.0001	5.83	50
		SS	14	Mouse							CTRL vs. RES	0.2036	1.866	50
		RES	22	Mouse							SS vs. RES	****<0.0001	7.918	50
Panel	Behavior	Group	N value	Replicate	Statistical test	P value	F value/KW statistic	df (between)	df (within)	Multiple Comparisons	Test	p value	t/Z value	df
S1A	Interaction Zone Time CD-1 Absent	CTRL	18	Mouse	One-way ANOVA	0.7768	0.2538	2	51	Bonferroni	CTRL vs. SS	>0.9999	0.2725	51
		SS	14	Mouse							CTRL vs. RES	>0.9999	0.7073	51
		RES	22	Mouse							SS vs. RES	>0.9999	0.3735	51
Panel	Behavior	Group	N value	Replicate	Statistical test	P value	F value/KW statistic	df (between)	df (within)	Multiple Comparisons	Test	p value	t/Z value	df
S1A	Interaction Zone Time CD-1 Present	CTRL	18	Mouse	One-way ANOVA	****<0.0001	20.87	2	51	Bonferroni	CTRL vs. SS	****<0.0001	5.69	51
		SS	14	Mouse							CTRL vs. RES	>0.9999	0.1256	51
		RES	22	Mouse							SS vs. RES	****<0.0001	5.814	51
Panel	Behavior	Group	N value	Replicate	Statistical test	P value	F value/KW statistic	df (between)	df (within)	Multiple Comparisons	Test	p value	t/Z value	df
S1A	Corner Zone Time CD-1 Absent	CTRL	18	Mouse	Kruskal-Wallis Test	0.7682	0.5273			Dunn's	CTRL vs. SS	>0.9999	0.7216
		SS	13	Mouse							CTRL vs. RES	>0.9999	0.2753
		RES	22	Mouse							SS vs. RES	>0.9999	0.5007
Panel	Behavior	Group	N value	Replicate	Statistical test	P value	F value/KW statistic	df (between)	df (within)	Multiple Comparisons	Test	p value	t/Z value	df
S1A	Corner Zone Time CD-1 Present	CTRL	18	Mouse	Kruskal-Wallis Test	0.0626	5.543			Dunn's	CTRL vs. SS	>0.9999	0.4998
		SS	14	Mouse							CTRL vs. RES	0.2307	1.769
		RES	22	Mouse							SS vs. RES	0.0916	2.163
Panel	Behavior	Group	N value	Replicate	Statistical test	P value	F value/KW statistic	df (between)	df (within)	Multiple Comparisons	Test	p value	t/Z value	df
S1A	Open Field Locomotion CD-1 Absent	CTRL	18	Mouse	One-way ANOVA	0.1409	2.037	2	51	Bonferroni	CTRL vs. SS	0.7197	1.189	51
		SS	14	Mouse							CTRL vs. RES	>0.9999	0.8379	51
		RES	22	Mouse							SS vs. RES	0.1465	2.018	51
Panel	Behavior	Group	N value	Replicate	Statistical test	P value	F value/KW statistic	df (between)	df (within)	Multiple Comparisons	Test	p value	t/Z value	df
S1A	Open Field Locomotion CD-1 Present	CTRL	18	Mouse	One-way ANOVA	0.2107	1.606	2	51	Bonferroni	CTRL vs. SS	>0.9999	0.338	51
		SS	14	Mouse							CTRL vs. RES	0.286	1.699	51
		RES	22	Mouse							SS vs. RES	0.6758	1.227	51
Panel	Behavior	Group	N value	Replicate	Statistical test	P value	F value/KW statistic	df (between)	df (within)	Multiple Comparisons	Test	p value	t/Z value	df
S1B	SI Ratio	CTRL	12	Mouse	One-way ANOVA	****<0.0001	20.31	2	35	Bonferroni	CTRL vs. SS	****<0.0001	4.675	35
		SS	9	Mouse							CTRL vs. RES	0.5054	1.406	35
		RES	17	Mouse							SS vs. RES	****<0.0001	6.286	35
Panel	Behavior	Group	N value	Replicate	Statistical test	P value	F value/KW statistic	df (between)	df (within)	Multiple Comparisons	Test	p value	t/Z value	df
S1B	Interaction Zone Time CD-1 Absent	CTRL	13	Mouse	One-way ANOVA	0.9515	0.004982	2	36	Bonferroni	CTRL vs. SS	>0.9999	0.2855	36
		SS	9	Mouse							CTRL vs. RES	>0.9999	0.01935	36
		RES	17	Mouse							SS vs. RES	>0.9999	0.283	36
Panel	Behavior	Group	N value	Replicate	Statistical test	P value	F value/KW statistic	df (between)	df (within)	Multiple Comparisons	Test	p value	t/Z value	df
S1B	Interaction Zone Time CD-1 Present	CTRL	13	Mouse	One-way ANOVA	****<0.0001	15.56	2	36	Bonferroni	CTRL vs. SS	***0.0001	4.711	36
		SS	9	Mouse							CTRL vs. RES	>0.9999	0.3504	36
		RES	17	Mouse							SS vs. RES	****<0.0001	5.269	36
Panel	Behavior	Group	N value	Replicate	Statistical test	P value	F value/KW statistic	df (between)	df (within)	Multiple Comparisons	Test	p value	t/Z value	df
S1B	Corner Zone Time CD-1 Absent	CTRL	13	Mouse	Kruskal-Wallis Test	0.6227	0.9474			Dunn's	CTRL vs. SS	0.995	0.9708
		SS	9	Mouse							CTRL vs. RES	>0.9999	0.5295
		RES	17	Mouse							SS vs. RES	>0.9999	0.5479
Panel	Behavior	Group	N value	Replicate	Statistical test	P value	F value/KW statistic	df (between)	df (within)	Multiple Comparisons	Test	p value	t/Z value	df
S1B	Corner Zone Time CD-1 Present	CTRL	13	Mouse	Kruskal-Wallis Test	0.0637	5.507			Dunn's	CTRL vs. SS	0.7689	1.135
		SS	9	Mouse							CTRL vs. RES	0.63	1.254
		RES	17	Mouse							SS vs. RES	0.0619	2.315
Panel	Behavior	Group	N value	Replicate	Statistical test	P value	F value/KW statistic	df (between)	df (within)	Multiple Comparisons	Test	p value	t/Z value	df
S1B	Open Field Locomotion CD-1 Absent	CTRL	13	Mouse	One-way ANOVA	0.6395	0.4526	2	36	Bonferroni	CTRL vs. SS	>0.9999	0.6371	36
		SS	9	Mouse							CTRL vs. RES	>0.9999	0.3126	36
		RES	17	Mouse							SS vs. RES	>0.9999	0.9496	36
Panel	Behavior	Group	N value	Replicate	Statistical test	P value	F value/KW statistic	df (between)	df (within)	Multiple Comparisons	Test	p value	t/Z value	df
S1B	Open Field Locomotion CD-1 Present	CTRL	13	Mouse	One-way ANOVA	0.1321	2.142	2	36	Bonferroni	CTRL vs. SS	>0.9999	0.1326	36
		SS	9	Mouse							CTRL vs. RES	0.2071	1.874	36
		RES	17	Mouse							SS vs. RES	0.4001	1.536	36
Panel	Behavior	Group	N value	Replicate	Statistical test	P value	F value/KW statistic	df (between)	df (within)	Multiple Comparisons	Test	p value	t/Z value
S1C	SI Ratio	CTRL	5	Mouse	Kruskal-Wallis Test	0.0031	9.36			Dunn's	CTRL vs. SS	0.1017	2.121
		SS	5	Mouse							CTRL vs. RES	>0.9999	0.8485
		RES	5	Mouse							SS vs. RES	**0.0089	2.97
Panel	Behavior	Group	N value	Replicate	Statistical test	P value	F value/KW statistic	df (between)	df (within)	Multiple Comparisons	Test	p value	t/Z value
S1C	Interaction Zone Time CD-1 Absent	CTRL	5	Mouse	Kruskal-Wallis Test	0.4661	1.62			Dunn's	CTRL vs. SS	>0.9999	0.6364
		SS	5	Mouse							CTRL vs. RES	0.6093	1.273
		RES	5	Mouse							SS vs. RES	>0.9999	0.6364
Panel	Behavior	Group	N value	Replicate	Statistical test	P value	F value/KW statistic	df (between)	df (within)	Multiple Comparisons	Test	p value	t/Z value
S1C	Interaction Zone Time CD-1 Present	CTRL	5	Mouse	Kruskal-Wallis Test	*0.0431	6.02			Dunn's	CTRL vs. SS	0.0486	2.404
		SS	5	Mouse							CTRL vs. RES	>0.9999	0.7778
		RES	5	Mouse							SS vs. RES	0.3116	1.626
Panel	Behavior	Group	N value	Replicate	Statistical test	P value	F value/KW statistic	df (between)	df (within)	Multiple Comparisons	Test	p value	t/Z value
S1C	Corner Zone Time CD-1 Absent	CTRL	5	Mouse	Kruskal-Wallis Test	0.976	0.05143			Dunn's	CTRL vs. SS	>0.9999	0.1069
		SS	5	Mouse							CTRL vs. RES	>0.9999	0.2268
		RES	5	Mouse							SS vs. RES	>0.9999	0.1069
Panel	Behavior	Group	N value	Replicate	Statistical test	P value	F value/KW statistic	df (between)	df (within)	Multiple Comparisons	Test	p value	t/Z value
S1C	Corner Zone Time CD-1 Present	CTRL	5	Mouse	Kruskal-Wallis Test	0.4925	1.555			Dunn's	CTRL vs. SS	0.8366	1.083
		SS	5	Mouse							CTRL vs. RES	0.9021	1.035
		RES	5	Mouse							SS vs. RES	>0.9999	0.04545
Panel	Behavior	Group	N value	Replicate	Statistical test	P value	F value/KW statistic	df (between)	df (within)	Multiple Comparisons	Test	p value	t/Z value
S1C	Open Field Locomotion CD-1 Absent	CTRL	5	Mouse	Kruskal-Wallis Test	0.1646	3.66			Dunn's	CTRL vs. SS	>0.9999	0.8485
		SS	5	Mouse							CTRL vs. RES	0.8665	1.061
		RES	5	Mouse							SS vs. RES	0.1687	1.909
Panel	Behavior	Group	N value	Replicate	Statistical test	P value	F value/KW statistic	df (between)	df (within)	Multiple Comparisons	Test	p value	t/Z value
S1C	Open Field Locomotion CD-1 Present	CTRL	5	Mouse	Kruskal-Wallis Test	0.8068	0.5			Dunn's	CTRL vs. SS	>0.9999	0.3536
		SS	5	Mouse							CTRL vs. RES	>0.9999	0.7071
		RES	5	Mouse							SS vs. RES	>0.9999	0.3536
Panel	Protein	Group	N value	Replicate	Statistical test	P value	F value/KW statistic	df (between)	df (within)	Multiple Comparisons	Test	p value	t/Z value
S1D	CD31 (%CTRL), NAc	CTRL	5	Mouse	Kruskal-Wallis Test	0.62	1.04			Dunn's	CTRL vs. SS	>0.9999	0.3536
		SS	5	Mouse							CTRL vs. RES	>0.9999	0.7071
		RES	5	Mouse							SS vs. RES	>0.9999	0.3536
Panel	Protein	Group	N value	Replicate	Statistical test	P value	F value/KW statistic	df (between)	df (within)	Post-Hoc	Test	P value	t/Z value
S1E	Cd31 (% CTRL), PFC	CTRL	5	Mouse	Kruskal-Wallis test	0.7591	0.62			Dunn's	CTRL vs. SS	>0.9999	0.495
		SS	5	Mouse							CTRL vs. RES	>0.9999	0.2828
		RES	5	Mouse							SS vs. RES	>0.9999	0.7778
Panel	Protein	Group	N value	Replicate	Statistical test	P value	F value/KW statistic	df (between)	df (within)	Post-Hoc	Test	P value	t/Z value
S1E	Cldn5/Cd31 (% CTRL), PFC	CTRL	5	Mouse	Kruskal-Wallis test	0.3532	2.22			Dunn's	CTRL vs. SS	>0.9999	0.8485
		SS	5	Mouse							CTRL vs. RES	0.4127	1.485
		RES	5	Mouse							SS vs. RES	>0.9999	0.6364
Panel	Protein	Group	N value	Replicate	Statistical test	P value	F value/KW statistic	df (between)	df (within)	Post-Hoc	Test	P value	t/Z value
S1E	Fgf2 (% CTRL), PFC	CTRL	5	Mouse	Kruskal-Wallis test	0.9826	0.06			Dunn's	CTRL vs. SS	>0.9999	0.2121
		SS	5	Mouse							CTRL vs. RES	>0.9999	0
		RES	5	Mouse							SS vs. RES	>0.9999	0.2121
Panel	X-axis	Y-axis	Group	N value	Replicate	Statistical test	Pearson r	P-value
S1E	Cldn5/Cd31 (% CTRL)	Fgf2 (% CTRL)	CTRL	5	Mouse	Linear regression	-0.1216	0.6659
			SS	5	Mouse
			RES	5	Mouse

## Sheet: Fig. S2
Panel	Behavior	Group	N value	Replicate	Statistical test	Factor	P value	F value	df (between)	df (within)
S2B	Interaction Zone Time CD-1 Present	SE CTRL	10	Mouse	Two-way ANOVA	Interaction	0.2904	1.15	1	38
		EE CTRL	12	Mouse		Stress	0.8386	0.04206	1	38
		SE CVS	8	Mouse		Environment	*0.0297	5.103	1	38
		CTRL CVS	12	Mouse
Panel	Behavior	Group	N value	Replicate	Statistical test	Factor	P value	F value	df (between)	df (within)
S2B	Sucrose prefence	SE CTRL	10	Mouse	Two-way ANOVA	Interaction	**0.0022	10.71	1	40
		EE CTRL	12	Mouse		Stress	**0.0032	9.858	1	40
		SE CVS	10	Mouse		Environment	****<0.0001	51.95	1	40
		CTRL CVS	12	Mouse
Panel	Behavior	Group	N value	Replicate	Statistical test	Factor	P value	F value	df (between)	df (within)
S2B	Time immobile	SE CTRL	9	Mouse	Two-way ANOVA	Interaction	0.2522	1.354	1	36
		EE CTRL	12	Mouse		Stress	0.8897	0.01951	1	36
		SE CVS	6	Mouse		Environment	0.3237	1.001	1	36
		CTRL CVS	12	Mouse
Panel	Behavior	Group	N value	Replicate	Statistical test	P value	t/u value	df
S2C	Time open arms	CTRL	11	Mouse	Welch's T-test	0.1135	1.652	21
		CVS	12	Mouse
Panel	Behavior	Group	N value	Replicate	Statistical test	P value	t/u value	df
S2C	Time closed arms	CTRL	11	Mouse	Welch's T-test	0.151	1.49	20.96
		CVS	12	Mouse
Panel	Behavior	Group	N value	Replicate	Statistical test	P value	t/u value	df
S2C	Time in middle	CTRL	12	Mouse	Welch's T-test	0.5699	0.5774	20.55
		CVS	11	Mouse
Panel	Behavior	Group	N value	Replicate	Statistical test	P value	t/u value	df
S2C	Total locomotion	CTRL	12	Mouse	Welch's T-test	0.3094	1.045	18.47
		CVS	12	Mouse
Panel	Behavior	Group	N value	Replicate	Statistical test	P value	t/u value	df
S2C	Entry ratio (open/closed)	CTRL	11	Mouse	Welch's T-test	0.2781	1.123	16.08
		CVS	12	Mouse
Panel	Behavior	Group	N value	Replicate	Statistical test	P value	t/u value	df
S2D	SI Ratio	CTRL	11	Mouse	Welch's T-test	0.3678	0.925	17.52
		CVS	11	Mouse
Panel	Behavior	Group	N value	Replicate	Statistical test	P value	t/u value	df
S2D	Interaction Zone Time CD-1 Absent	CTRL	12	Mouse	Mann-Whitney U test	0.0662	36
		CVS	11	Mouse
Panel	Behavior	Group	N value	Replicate	Statistical test	P value	t/u value	df
S2D	Interaction Zone Time CD-1 Present	CTRL	12	Mouse	Welch's T-test	0.4493	0.7777	14.4
		CVS	12	Mouse
Panel	Behavior	Group	N value	Replicate	Statistical test	P value	t/u value	df
S2D	Corner Zone Time CD-1 Absent	CTRL	12	Mouse	Welch's T-test	0.6701	0.4335	16.94
		CVS	11	Mouse
Panel	Behavior	Group	N value	Replicate	Statistical test	P value	t/u value	df
S2D	Corner Zone Time CD-1 Present	CTRL	11	Mouse	Welch's T-test	0.3383	45.5
		CVS	11	Mouse
Panel	Behavior	Group	N value	Replicate	Statistical test	P value	t/u value	df
S2D	Open Field Locomotion CD-1 Absent	CTRL	12	Mouse	Welch's T-test	0.5967	0.5373	20.88
		CVS	12	Mouse
Panel	Behavior	Group	N value	Replicate	Statistical test	P value	t/u value	df
S2D	Open Field Locomotion CD-1 Present	CTRL	12	Mouse	Welch's T-test	0.0445	2.142	20.22
		CVS	12	Mouse
Panel	Behavior	Group	N value	Replicate	Statistical test	P value	t/u value	df
S2E	24 h Sucrose preference	CTRL	12	Mouse	Welch's T-test	0.8971	0.1309	20.75
		CVS	12	Mouse
Panel	Behavior	Group	N value	Replicate	Statistical test	P value	t/u value	df
S2E	48 h Sucrose Preference	CTRL	12	Mouse	Mann-Whitney U Test	0.8428	68
		CVS	12	Mouse
Panel	Behavior	Group	N value	Replicate	Statistical test	P value	t/u value	df
S2E	Average sucrose preference	CTRL	12	Mouse	Welch's T-test	0.8756	0.1585	21.36
		CVS	12	Mouse
Panel	Behavior	Group	N value	Replicate	Statistical test	P value	t/u value	df
S2F	Time immobile	CTRL	12	Mouse	Welch's T-test	0.4561	0.7596	20.62
		CVS	12	Mouse
Panel	Behavior	Group	N value	Replicate	Statistical test	P value	t/u value	df
S2F	Latency to immobility	CTRL	12	Mouse	Welch's T-test	0.3712	0.9162	18.68
		CVS	11	Mouse

## Sheet: Fig. S3
Panel	Protein	Group	N value	Replicate	Statistical test	P value	t/u value	df
S3C	CD31 (%CTRL), PFC	CTRL	8	Mouse	Welch's T-test	0.6584	0.4505	15.99
		STRESS	10	Mouse
Panel	Behaviour	Group	N value	Replicate	Statistical test	P value	t/u value	df
S3D	Time open arms	CTRL	11	Mouse	Welch's T-test	0.3409	0.9758	19.84
		STRESS	11	Mouse
Panel	Behaviour	Group	N value	Replicate	Statistical test	P value	t/u value	df
S3D	Time Closed arms	CTRL	12	Mouse	Welch's T-test	0.2313	1.237	18.71
		STRESS	11	Mouse
Panel	Behaviour	Group	N value	Replicate	Statistical test	P value	t/u value	df
S3D	Time in middle	CTRL	12	Mouse	Welch's T-test	0.9964	0.004388	21.88
		STRESS	12	Mouse
Panel	Behaviour	Group	N value	Replicate	Statistical test	P value	t/u value	df
S3D	Total locomotion	CTRL	11	Mouse	Welch's T-test	0.878	0.1555	19.36
		STRESS	12	Mouse
Panel	Behaviour	Group	N value	Replicate	Statistical test	P value	t/u value	df
S3D	Entry ratio (open/closed)	CTRL	12	Mouse	Welch's T-test	0.647	0.4643	21.82
		STRESS	12	Mouse
Panel	Protein	Group	N value	Replicate	Statistical test	P value	t/u value	df
S3E	Cd31 (% CTRL), Nac	CTRL	11	Mouse	Welch's T-test	>0.999	1.781e-05	18
		STRESS	9	Mouse
Panel	Protein	Group	N value	Replicate	Statistical test	P value	t/u value	df
S3E	Cldn5/Cd31 (% CTRL), Nac	CTRL	11	Mouse	Welch's T-test	0.9025	0.1248	13.59
		STRESS	9	Mouse
Panel	Protein	Group	N value	Replicate	Statistical test	P value	t/u value	df
S3E	Fgf2(% CTRL), Nac	CTRL	11	Mouse	Welch's T-test	0.221	1.272	16.46
		STRESS	9	Mouse
Panel	X-axis	Y-axis	Group	N value	Replicate	Statistical test	Pearson r	P-value
S1E	Cldn5/Cd31 (% CTRL)	Fgf2 (% CTRL)	CTRL	11	Mouse	Linear regression	0.1402	0.5553
			STRESS	9	Mouse

## Sheet: Fig. S4
Panel	Behavior	Group	N value	Replicate	Statistical test	P value	F value/KW statistic	df (between)	df (within)	Multiple Comparisons	Test	p value	t/Z value	df
S4A	SI Ratio	CTRL	18	Mouse	Kruskal-Wallis Test	****<0.0001	37.88			Dunn's	CTRL vs. SS	****<0.0001	5.548
		SS	19	Mouse							CTRL vs. RES	>0.9999	0.6911
		RES	22	Mouse							SS vs. RES	****<0.0001	5.125
Panel	Behavior	Group	N value	Replicate	Statistical test	P value	F value/KW statistic	df (between)	df (within)	Multiple Comparisons	Test	p value	t/Z value	df
S4A	Interaction Zone Time CD-1 Absent	CTRL	19	Mouse	One-way ANOVA	0.6251	0.4738	2	56	Bonferroni	CTRL vs. SS	0.9706	0.2328	56
		SS	18	Mouse							CTRL vs. RES	0.6228	0.9315	56
		RES	22	Mouse							SS vs. RES	0.7778	0.677	56
Panel	Behavior	Group	N value	Replicate	Statistical test	P value	F value/KW statistic	df (between)	df (within)	Multiple Comparisons	Test	p value	t/Z value	df
S4A	Interaction Zone Time CD-1 Present	CTRL	18	Mouse	One-way ANOVA	****<0.0001	28.79	2	56	Bonferroni	CTRL vs. SS	****<0.0001	6.17	56
		SS	19	Mouse							CTRL vs. RES	>0.9999	0.4623	56
		RES	22	Mouse							SS vs. RES	****<0.0001	6.949	56
Panel	Behavior	Group	N value	Replicate	Statistical test	P value	F value/KW statistic	df (between)	df (within)	Multiple Comparisons	Test	p value	t/Z value	df
S4A	Corner Zone Time CD-1 Absent	CTRL	19	Mouse	Kruskal-Wallis Test	0.7776	0.5031			Dunn's	CTRL vs. SS	>0.9999	0.6817
		SS	18	Mouse							CTRL vs. RES	>0.9999	0.5168
		RES	22	Mouse							SS vs. RES	>0.9999	0.1962
Panel	Behavior	Group	N value	Replicate	Statistical test	P value	F value/KW statistic	df (between)	df (within)	Multiple Comparisons	Test	p value	t/Z value	df
S4A	Corner Zone Time CD-1 Present	CTRL	18	Mouse	Kruskal-Wallis Test	0.188	3.342			Dunn's	CTRL vs. SS	>0.9999	0.8653
		SS	19	Mouse							CTRL vs. RES	>0.9999	0.9149
		RES	21	Mouse							SS vs. RES	0.2031	1.827
Panel	Behavior	Group	N value	Replicate	Statistical test	P value	F value/KW statistic	df (between)	df (within)	Multiple Comparisons	Test	p value	t/Z value	df
S4A	Open Field Locomotion CD-1 Absent	CTRL	19	Mouse	One-way ANOVA	0.6589	0.4202	2	57	Bonferroni	CTRL vs. SS	>0.9999	0.3185	57
		SS	19	Mouse							CTRL vs. RES	>0.9999	0.9003	57
		RES	22	Mouse							SS vs. RES	>0.9999	0.5704	57
Panel	Behavior	Group	N value	Replicate	Statistical test	P value	F value/KW statistic	df (between)	df (within)	Multiple Comparisons	Test	p value	t/Z value	df
S4A	Open Field Locomotion CD-1 Present	CTRL	19	Mouse	One-way ANOVA	0.6853	0.3804	2	57	Bonferroni	CTRL vs. SS	>0.9999	0.3343	57
		SS	19	Mouse							CTRL vs. RES	>0.9999	0.516	57
		RES	22	Mouse							SS vs. RES	>0.9999	0.8623	57
Panel	Behavior	Group	N value	Replicate	Statistical test	P value	F value/KW statistic	df (between)	df (within)	Multiple Comparisons	Test	p value	t/Z value	df
S4B	SI Ratio	CTRL	12	Mouse	One-way ANOVA	****<0.0001	33.69	2	34	Bonferroni	CTRL vs. SS	<0.0001	7.703
		SS	13	Mouse							CTRL vs. RES	0.4369	1.489
		RES	12	Mouse							SS vs. RES	<0.0001	6.185
Panel	Behavior	Group	N value	Replicate	Statistical test	P value	F value/KW statistic	df (between)	df (within)	Multiple Comparisons	Test	p value	t/Z value	df
S4B	Interaction Zone Time CD-1 Absent	CTRL	12	Mouse	One-way ANOVA	0.0882	2.61	2	34	Bonferroni	CTRL vs. SS	>0.9999	0.232	34
		SS	13	Mouse							CTRL vs. RES	0.2248	1.837	34
		RES	12	Mouse							SS vs. RES	0.1281	2.106	34
Panel	Behavior	Group	N value	Replicate	Statistical test	P value	F value/KW statistic	df (between)	df (within)	Multiple Comparisons	Test	p value	t/Z value	df
S4B	Interaction Zone Time CD-1 Present	CTRL	12	Mouse	One-way ANOVA	****<0.0001	31.24	2	34	Bonferroni	CTRL vs. SS	<0.0001	5.998	34
		SS	13	Mouse							CTRL vs. RES	0.5377	1.371	34
		RES	12	Mouse							SS vs. RES	<0.0001	7.396	34
Panel	Behavior	Group	N value	Replicate	Statistical test	P value	F value/KW statistic	df (between)	df (within)	Multiple Comparisons	Test	p value	t/Z value	df
S4B	Corner Zone Time CD-1 Absent	CTRL	12	Mouse	One-way ANOVA	0.2837	1.309	2	33	Dunn's	CTRL vs. SS	>0.9999	0.5789	33
		SS	12	Mouse							CTRL vs. RES	0.9468	1.019	33
		RES	12	Mouse							SS vs. RES	0.3588	1.598	33
Panel	Behavior	Group	N value	Replicate	Statistical test	P value	F value/KW statistic	df (between)	df (within)	Multiple Comparisons	Test	p value	t/Z value	df
S4B	Corner Zone Time CD-1 Present	CTRL	11	Mouse	Kruskal-Wallis Test	0.2251	2.982			Dunn's	CTRL vs. SS	0.4082	1.491
		SS	13	Mouse							CTRL vs. RES	>0.9999	0.03126
		RES	11	Mouse							SS vs. RES	0.4345	1.458
Panel	Behavior	Group	N value	Replicate	Statistical test	P value	F value/KW statistic	df (between)	df (within)	Multiple Comparisons	Test	p value	t/Z value	df
S4B	Open Field Locomotion CD-1 Absent	CTRL	12	Mouse	One-way ANOVA	0.0912	2.572	2	34	Bonferroni	CTRL vs. SS	0.5458	1.363	34
		SS	13	Mouse							CTRL vs. RES	0.0922	2.254	34
		RES	12	Mouse							SS vs. RES	>0.9999	0.9364	34
Panel	Behavior	Group	N value	Replicate	Statistical test	P value	F value/KW statistic	df (between)	df (within)	Multiple Comparisons	Test	p value	t/Z value	df
S4B	Open Field Locomotion CD-1 Present	CTRL	12	Mouse	One-way ANOVA	0.7588	0.2783	2	34	Bonferroni	CTRL vs. SS	>0.9999	0.3306	34
		SS	13	Mouse							CTRL vs. RES	>0.9999	0.4068	34
		RES	12	Mouse							SS vs. RES	>0.9999	0.7454	34
Panel	Behavior	Group	N value	Replicate	Statistical test	P value	F value/KW statistic	df (between)	df (within)	Multiple Comparisons	Test	p value	t/Z value	df
S4C	SI Ratio	CTRL	6	Mouse	One-way ANOVA	**0.0022	8.61	2	19	Bonferroni	CTRL vs. SS	*0.0116	3.288	19
		SS	6	Mouse							CTRL vs. RES	>0.9999	0.2605	19
		RES	10	Mouse							SS vs. RES	**0.0027	3.937	19
Panel	Behavior	Group	N value	Replicate	Statistical test	P value	F value/KW statistic	df (between)	df (within)	Multiple Comparisons	Test	p value	t/Z value	df
S4C	Interaction Zone Time CD-1 Absent	CTRL	6	Mouse	One-way ANOVA	0.674	0.4028	2	19	Bonferroni	CTRL vs. SS	>0.9999	0.1588	19
		SS	6	Mouse							CTRL vs. RES	>0.9999	0.6436	19
		RES	10	Mouse							SS vs. RES	>0.9999	0.8212	19
Panel	Behavior	Group	N value	Replicate	Statistical test	P value	F value/KW statistic	df (between)	df (within)	Multiple Comparisons	Test	p value	t/Z value	df
S4C	Interaction Zone Time CD-1 Present	CTRL	6	Mouse	One-way ANOVA	*0.0207	4.789	2	19	Bonferroni	CTRL vs. SS	*0.0306	2.853	19
		SS	6	Mouse							CTRL vs. RES	>0.9999	0.5996	19
		RES	10	Mouse							SS vs. RES	0.0539	2.59	19
Panel	Behavior	Group	N value	Replicate	Statistical test	P value	F value/KW statistic	df (between)	df (within)	Multiple Comparisons	Test	p value	t/Z value	df
S4C	Corner Zone Time CD-1 Absent	CTRL	6	Mouse	One-way ANOVA	**0.0016	9.466	2	18	Bonferroni	CTRL vs. SS	*0.0305	2.871	18
		SS	5	Mouse							CTRL vs. RES	0.6976	1.235	18
		RES	10	Mouse							SS vs. RES	**0.0012	4.339	18
Panel	Behavior	Group	N value	Replicate	Statistical test	P value	F value/KW statistic	df (between)	df (within)	Multiple Comparisons	Test	p value	t/Z value	df
S4C	Corner Zone Time CD-1 Present	CTRL	5	Mouse	One-way ANOVA	0.1423	2.191	2	17	Bonferroni	CTRL vs. SS	0.6317	1.301	17
		SS	6	Mouse							CTRL vs. RES	>0.9999	0.5512	17
		RES	9	Mouse							SS vs. RES	0.1595	2.078	17
Panel	Behavior	Group	N value	Replicate	Statistical test	P value	F value/KW statistic	df (between)	df (within)	Multiple Comparisons	Test	p value	t/Z value	df
S4C	Open Field Locomotion CD-1 Absent	CTRL	6	Mouse	One-way ANOVA	0.6784	0.396	2	19	Bonferroni	CTRL vs. SS	>0.9999	0.8647	19
		SS	6	Mouse							CTRL vs. RES	>0.9999	0.6578	19
		RES	10	Mouse							SS vs. RES	>0.9999	0.309	19
Panel	Behavior	Group	N value	Replicate	Statistical test	P value	F value/KW statistic	df (between)	df (within)	Multiple Comparisons	Test	p value	t/Z value	df
S4C	Open Field Locomotion CD-1 Present	CTRL	6	Mouse	One-way ANOVA	0.5402	0.6362	2	19	Bonferroni	CTRL vs. SS	>0.9999	0.1076	19
		SS	6	Mouse							CTRL vs. RES	>0.9999	0.9912	19
		RES	10	Mouse							SS vs. RES	>0.9999	0.8709	19
Panel	Protein	Group	N value	Replicate	Statistical test	P value	F value/KW statistic	df (between)	df (within)	Multiple Comparisons	Test	p value	t/Z value	df
S4D	CD31 (%CTRL), NAc	CTRL	5	Mouse	One-way ANOVA	0.123	2.36	2	18	Bonferroni	CTRL vs. SS	0.6754	1.256	18
		SS	6	Mouse							CTRL vs. RES	0.1305	2.171	18
		RES	10	Mouse							SS vs. RES	>0.9999	0.8303	18
Panel	X-axis	Y-axis	Group	N value	Replicate	Statistical test	Pearson r	P-value
S4D	Cldn5/Cd31 (% CTRL), NAc	Fgf2 (% CTRL)	CTRL	6	Mouse	Linear regression	0.1459	0.528
			SS	6	Mouse
			RES	10	Mouse
Panel	Protein	Group	N value	Replicate	Statistical test	P value	F value/KW statistic	df (between)	df (within)	Multiple Comparisons	Test	P value	t/Z value	df
S4F	Cd31 (% CTRL), PFC	CTRL	6	Mouse	One-way ANOVA	0.6117	0.5045	2	19	Bonferroni	CTRL vs. SS	>0.9999	0.688	19
		SS	6	Mouse							CTRL vs. RES	>0.9999	0.2222	19
		RES	10	Mouse							SS vs. RES	>0.9999	0.9914	19
Panel	Protein	Group	N value	Replicate	Statistical test	P value	F value/KW statistic	df (between)	df (within)	Multiple Comparisons	Test	P value	t/Z value	df
S4F	Cldn5/Cd31 (% CTRL), PFC	CTRL	6	Mouse	One-way ANOVA	0.873	0.1368	2	19	Bonferroni	CTRL vs. SS	>0.9999	0.5205	19
		SS	6	Mouse							CTRL vs. RES	>0.9999	0.334	19
		RES	10	Mouse							SS vs. RES	>0.9999	0.2479	19
Panel	Protein	Group	N value	Replicate	Statistical test	P value	F value/KW statistic	df (between)	df (within)	Multiple Comparisons	Test	P value	t/Z value	df
S4F	Fgf2 (% CTRL), PFC	CTRL	6	Mouse	One-way ANOVA	0.5609	0.5962	2	19	Bonferroni	CTRL vs. SS	>0.9999	0.8164	19
		SS	6	Mouse							CTRL vs. RES	>0.9999	0.1449	19
		RES	10	Mouse							SS vs. RES	0.9104	1.058	19
Panel	X-axis	Y-axis	Group	N value	Replicate	Statistical test	Pearson r	P-value
S1E	Cldn5/Cd31 (% CTRL), PFC	Fgf2 (% CTRL)	CTRL	6	Mouse	Linear regression	-0.194	0.3869
			SS	6	Mouse
			RES	10	Mouse

[truncated: 1 more sheets: Fig. S5]
